# Supplementary material for: Machine learning-assisted identification of bioindicators predicts medium-chain carboxylate production performance of an anaerobic mixed culture
Source: PubMed Central journal article supplement (PMC8952268; doi:10.1186/s40168-021-01219-2), 2022-03-25
Supplement: 40168_2021_1219_MOESM2_ESM.pdf [file 40168_2021_1219_MOESM2_ESM.pdf]

**Machine learning-assisted identification of bioindicators predicts medium-chain  
carboxylate production performance of an anaerobic mixed culture**

**Additional File 1. Figures S1-S18 and Tables S1-S5**

Bin Liu<sup>1</sup>, Heike Sträuber<sup>1</sup>, João Saraiva<sup>1</sup>, Hauke Harms<sup>1</sup>, Sandra Godinho Silva<sup>2</sup>, Jonas Coelho  
Kasmanas<sup>1,3,4</sup>, Sabine Kleinsteuber<sup>1\*</sup> and Ulisses Nunes da Rocha<sup>1\*</sup>

<sup>1</sup>Department of Environmental Microbiology, Helmholtz Centre for Environmental Research –  
UFZ, Leipzig, Germany

<sup>2</sup>Institute for Bioengineering and Biosciences, Department of Bioengineering, Instituto Superior  
Técnico Universidade de Lisboa, Lisbon, Portugal

<sup>3</sup>Institute of Mathematics and Computer Sciences, University of São Paulo, São Carlos, Brazil

<sup>4</sup>Department of Computer Science and Interdisciplinary Center of Bioinformatics, University of  
Leipzig, Leipzig, Germany

**Corresponding authors**

sabine.kleinsteuber@ufz.de / ulisses.rocha@ufz.de (ordered alphabetically according to last name).

\*These authors contributed euqally to this work

## Contents

|                                                                                                                                                                                                |    |
|------------------------------------------------------------------------------------------------------------------------------------------------------------------------------------------------|----|
| Figure S1. Gas production of bioreactors. ....                                                                                                                                                 | 3  |
| Figure S2. Biomass production and correlation of bioreactors. ....                                                                                                                             | 4  |
| Figure S3. Microbial community composition profiles of bioreactors. ....                                                                                                                       | 7  |
| Figure S4. Alpha diversity metrics of bioreactor communities. ....                                                                                                                             | 8  |
| Figure S5. Predictive performance of three machine learning algorithms using HRT bioindicators. ....                                                                                           | 9  |
| Figure S6. Predictive performance of three machine learning algorithms using non-HRT bioindicators for considering community assembly caused by time. ....                                     | 10 |
| Figure S7. Prediction results of C6 and C8 productivities using non-HRT bioindicators for considering community assembly caused by time. ....                                                  | 11 |
| Figure S8. Prediction results of C6 and C8 productivities for all samples in the four HRT phases using HRT bioindicators. ....                                                                 | 12 |
| Figure S9. Prediction results of C6 and C8 productivities for all samples in the four HRT phases using non-HRT bioindicators for considering community assembly caused by time. ....           | 13 |
| Figure S10. Random forest feature importance of A-HRT bioindicators and B-HRT bioindicators used to predict C6 and C8 productivities. ....                                                     | 14 |
| Figure S11. Random forest feature importance of the non-HRT bioindicators used to predict C6 and C8 productivities. ....                                                                       | 15 |
| Figure S12. Metabolic pathways involved in converting lactate and xylan to <i>n</i> -caproate and <i>n</i> -caprylate. ....                                                                    | 17 |
| Figure S13. Correlation network of environmental factors, process performance and microbial community. ....                                                                                    | 18 |
| Figure S14. Prediction results of C6 and C8 productivities for all samples in the four HRT phases using the four ASVs of HRT bioindicators irrespective of time. ....                          | 19 |
| Figure S15. Reducing HRT increases abundances of HRT bioindicators driving the catabolism of xylan and lactate to <i>n</i> -caproate and <i>n</i> -caprylate. ....                             | 20 |
| Figure S16. Alpha rarefaction curves. ....                                                                                                                                                     | 22 |
| Figure S17. Workflow of the random forest classification analysis. ....                                                                                                                        | 23 |
| Figure S18. Workflow of a two-step random forest regression analysis. ....                                                                                                                     | 23 |
| Table S1. Mean carboxylate yields (i.e. C mole product to substrate ratios) at HRTs of 8 days and 2 days (stable production period). ....                                                      | 24 |
| Table S2. Explained variances of the training set in the regression-based prediction of process parameters using A-HRT bioindicators and B-HRT bioindicators. ....                             | 25 |
| Table S3. Explained variances of the training set in the regression-based prediction of process parameters using non-HRT bioindicators for considering community assembly caused by time. .... | 26 |
| Table S4. Growth medium used for the reactor operation. ....                                                                                                                                   | 27 |
| Table S5. Daily feeding of bioreactors A and B during the four HRT phases. ....                                                                                                                | 28 |

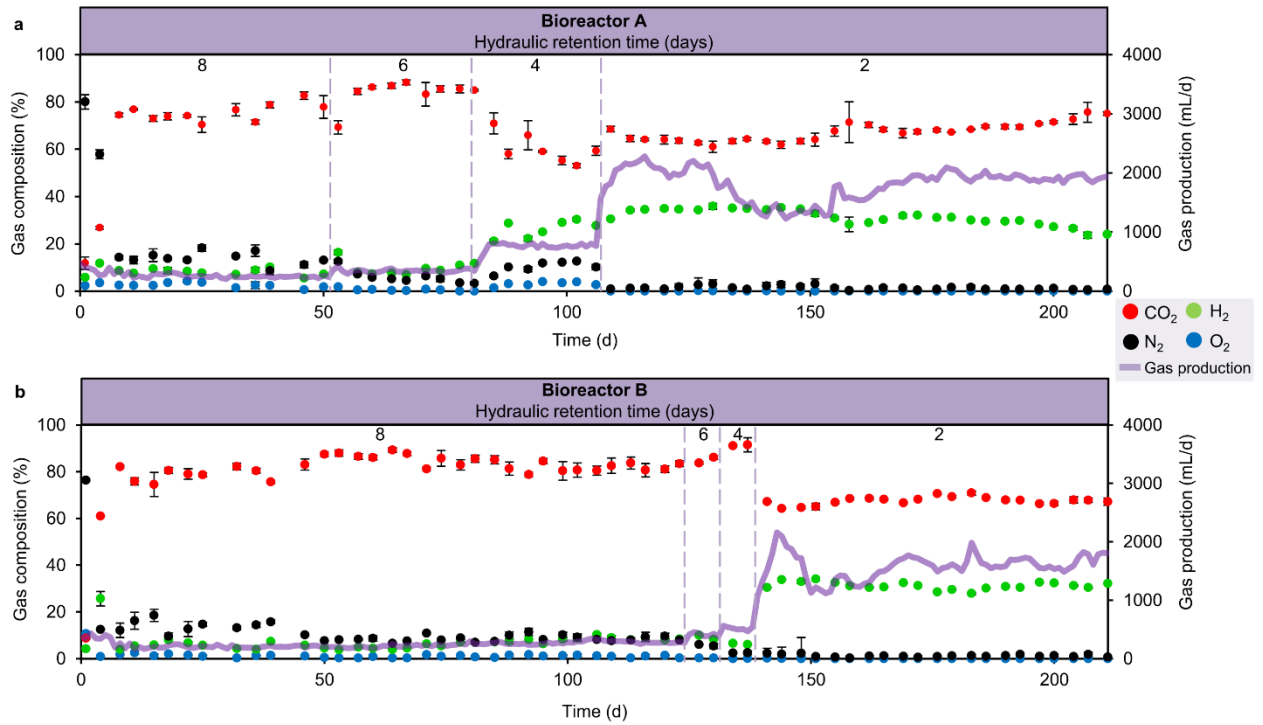

**Figure S1. Gas production of bioreactors.** Daily gas production and composition in bioreactors A (a) and B (b), respectively, during the four HRT phases. Error bars indicate the standard deviation.

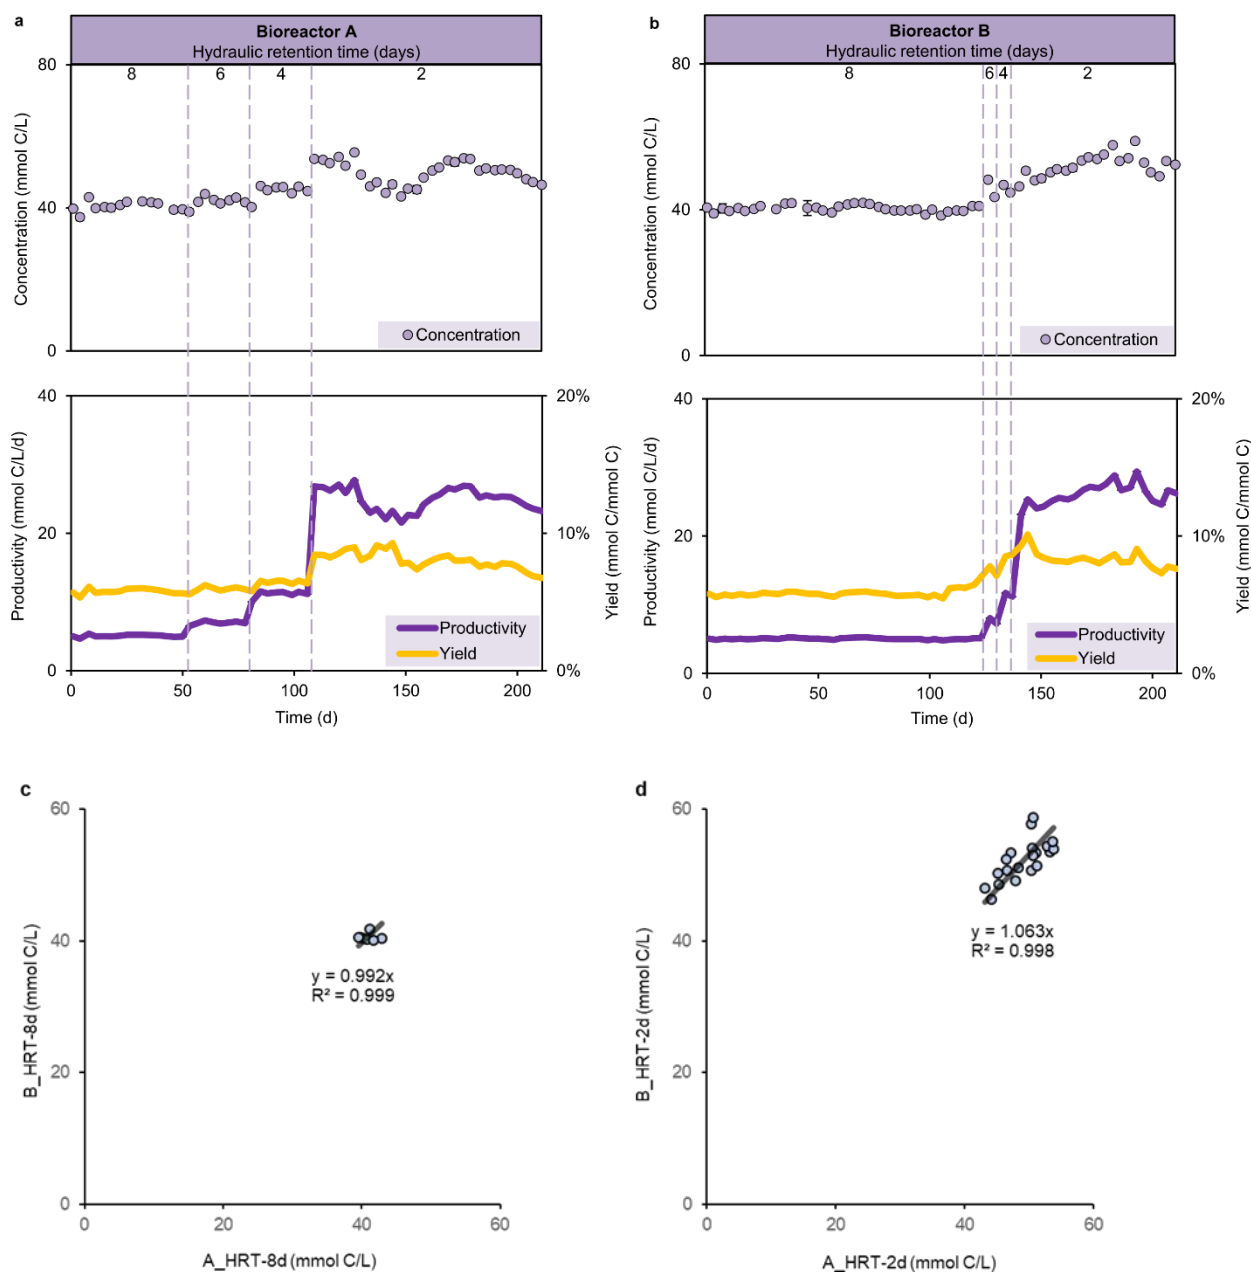

**Figure S2. Biomass production and correlation of bioreactors.** Cell concentration, biomass productivity and biomass yield in bioreactors A (a) and B (b) during the four HRT phases; and the correlations of cell concentration between bioreactors A and B at HRTs of 8 days (c) and 2 days (d) within the same time period. The carbon number of cell biomass was calculated by assuming an elemental biomass composition of  $\text{CH}_{1.8}\text{O}_{0.5}\text{N}_{0.2}$  (molar mass =  $24.6 \text{ g mol}^{-1}$ ). Error bars represent the standard deviation.

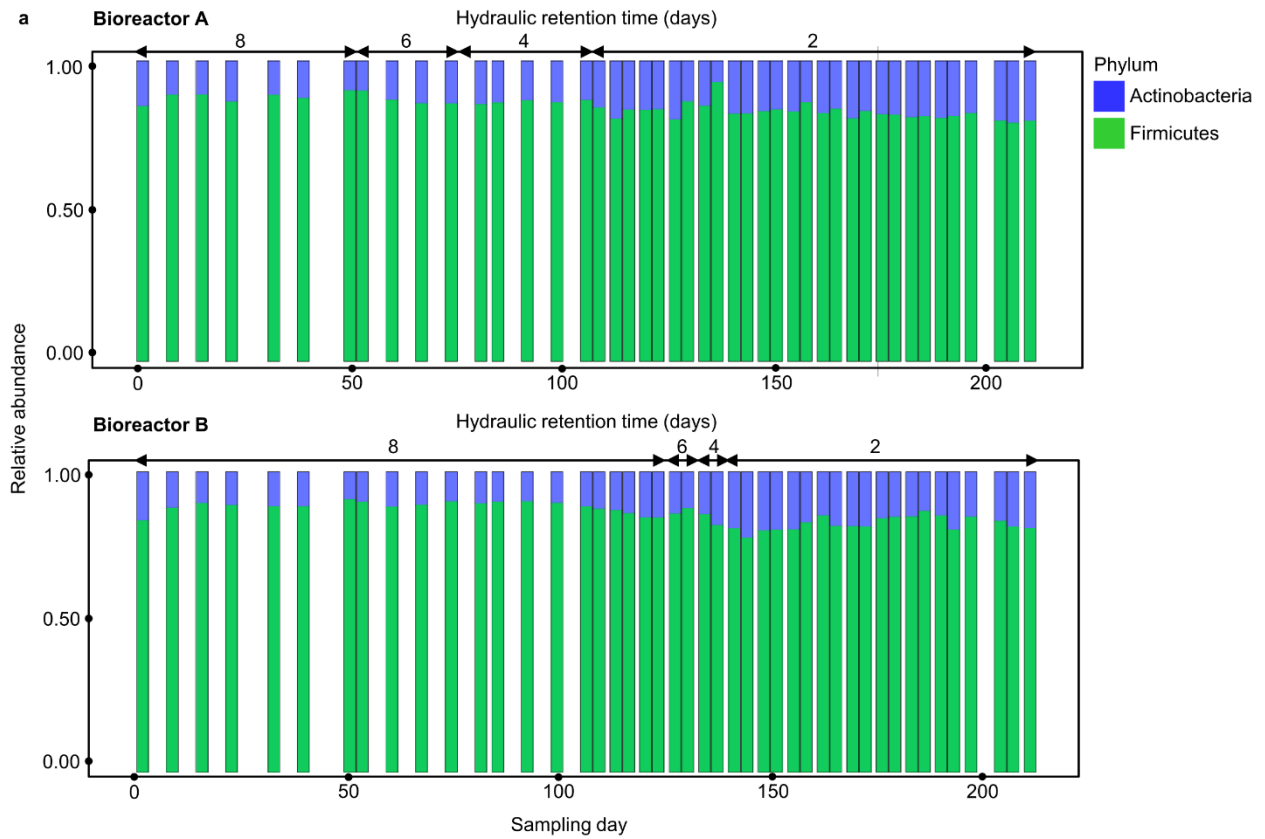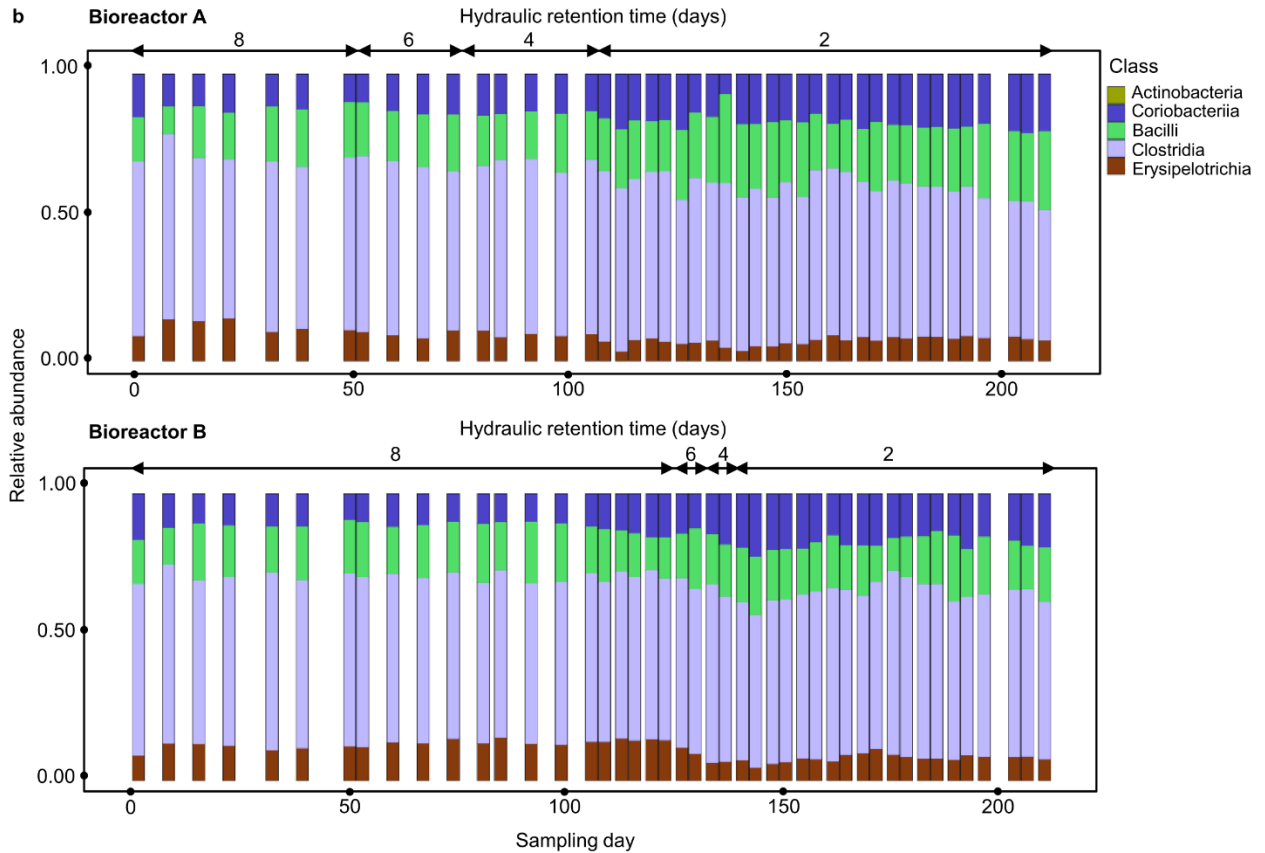

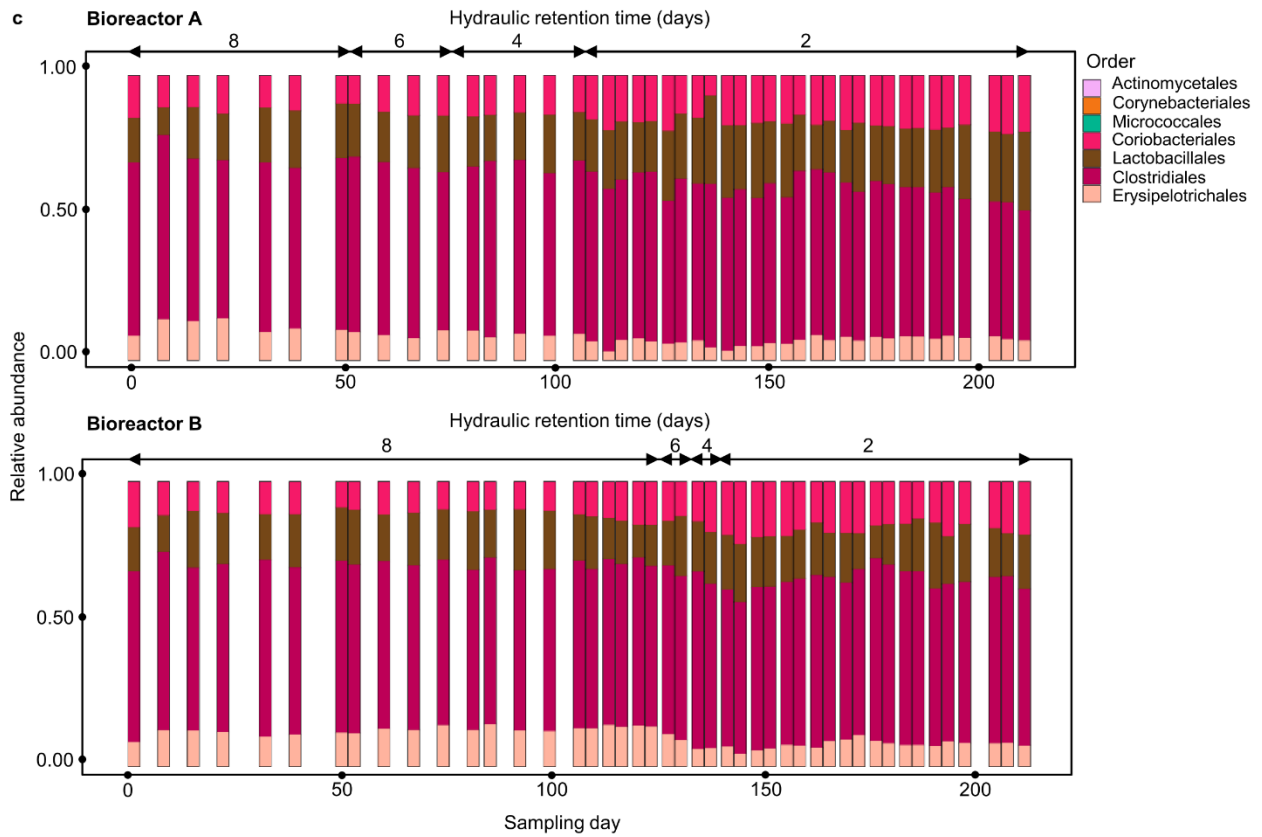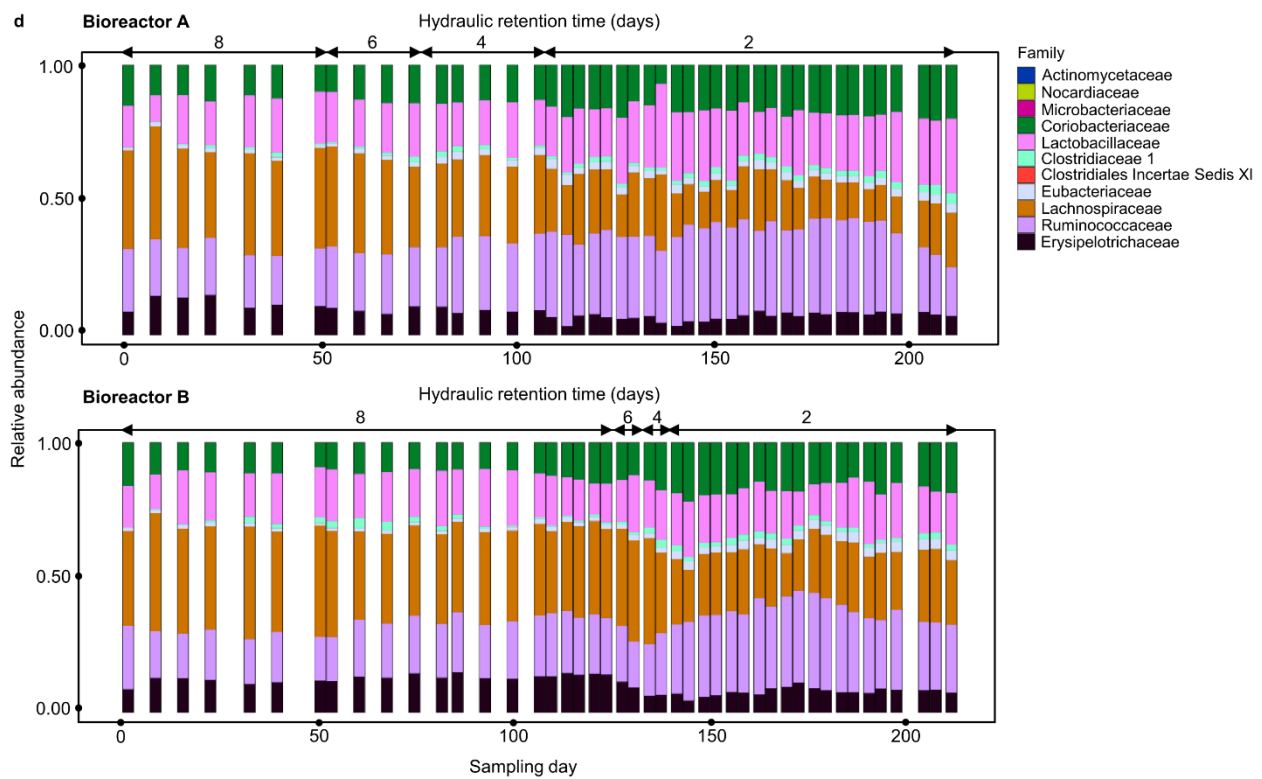

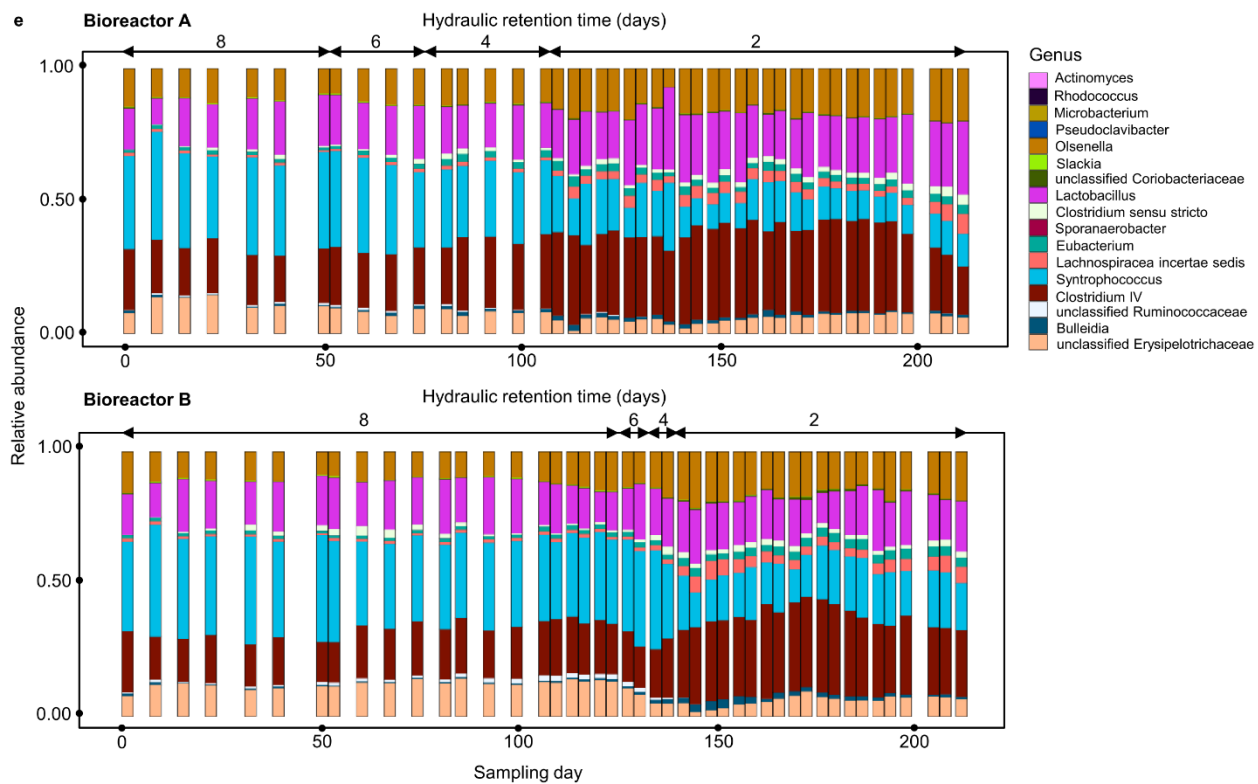

**Figure S3. Microbial community composition profiles of bioreactors.** Based on amplicon sequencing of 16S rRNA genes, the taxonomic classification of amplicon sequence variants (ASVs) was categorised at the phylum (a), class (b), order (c), family (d) and genus (e) levels.

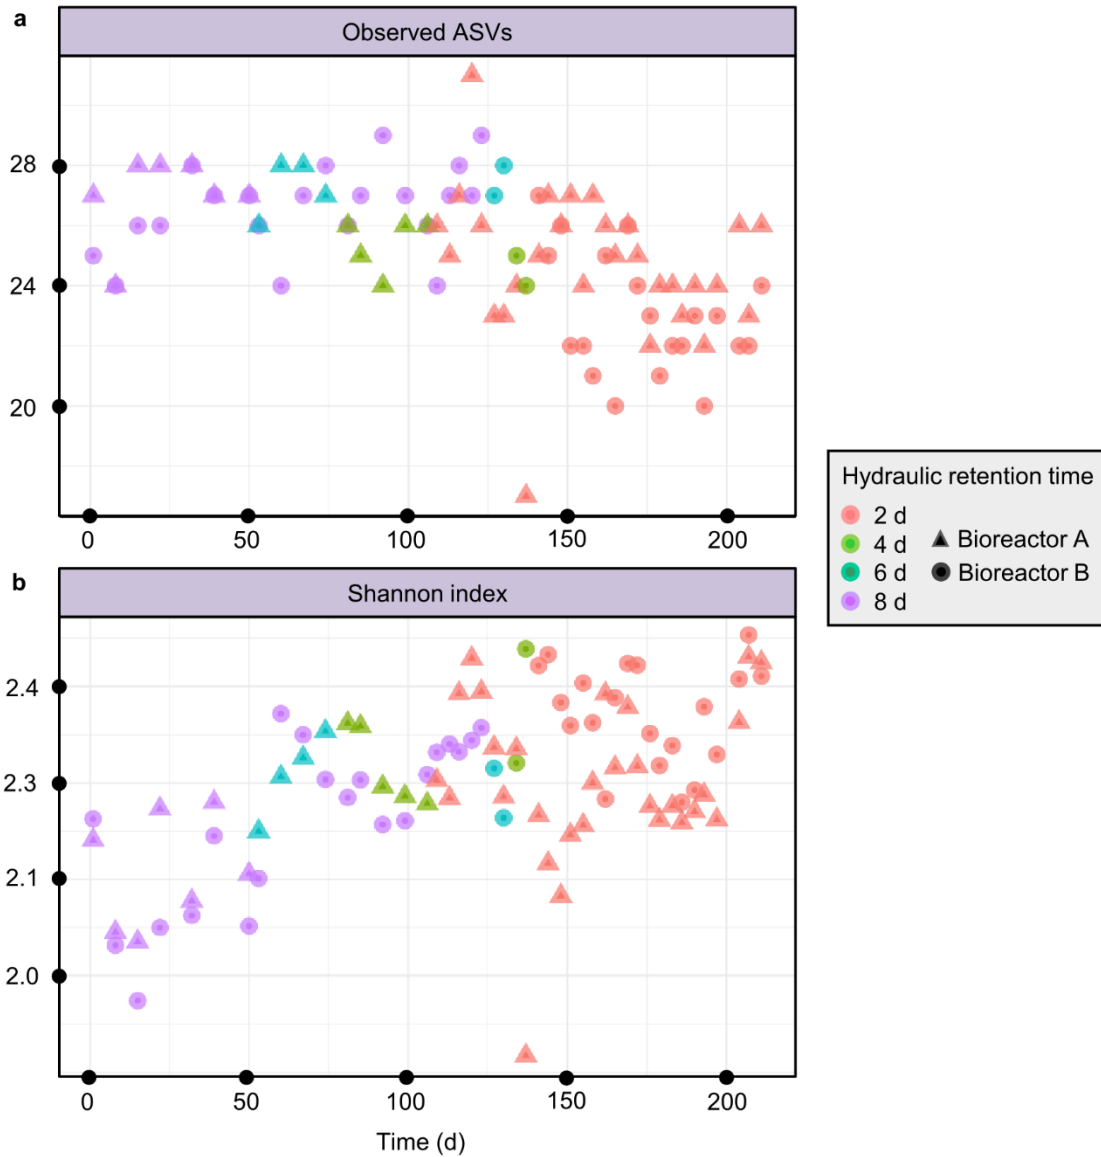

**Figure S4. Alpha diversity metrics of bioreactor communities.** Based on the relative abundance of ASVs, we calculated the alpha diversity represented by observed ASV counts (**a**) and Shannon index (**b**).



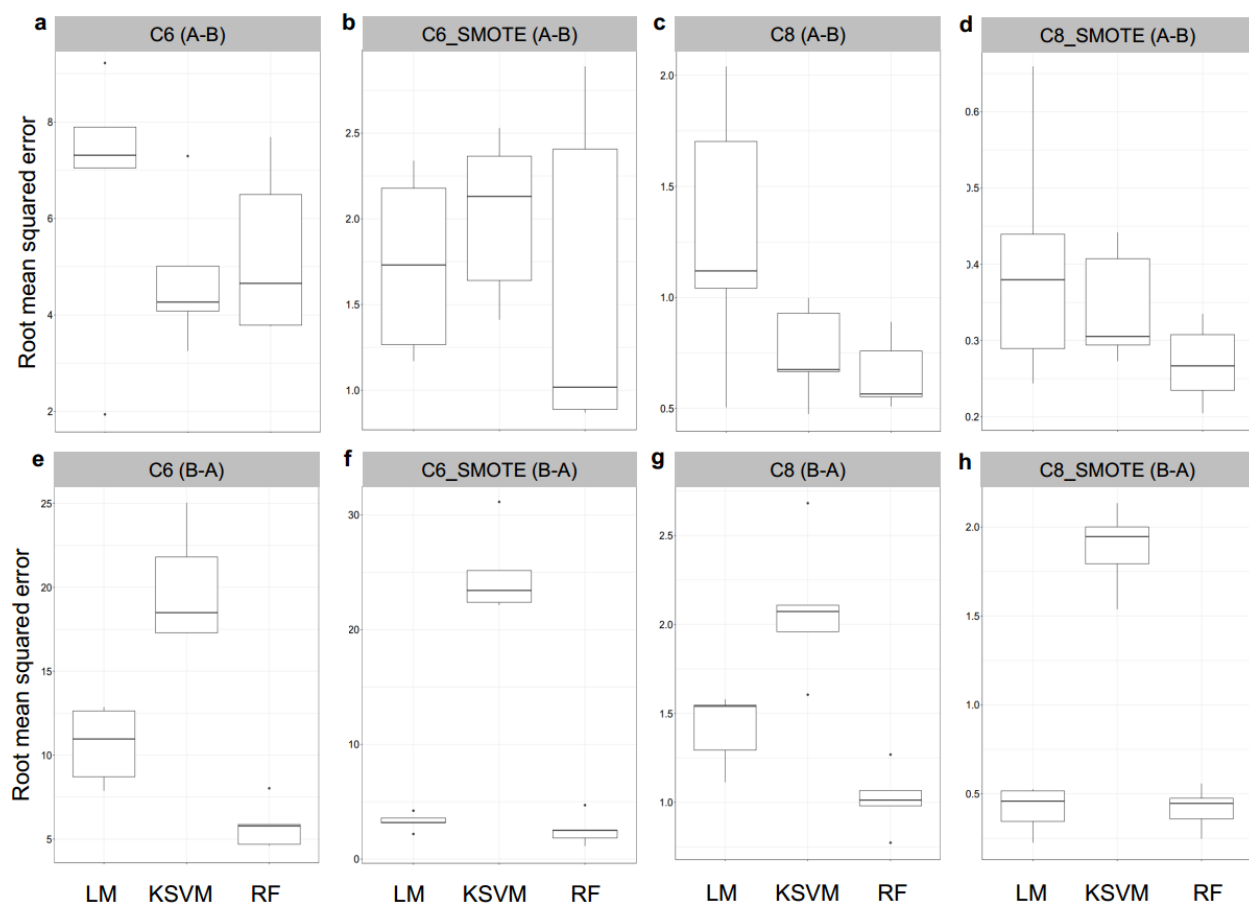

**Figure S5. Predictive performance of three machine learning algorithms using HRT bioindicators.** **a,b**, prediction of C6 productivity using the relative abundance data of bioreactor A for training the models and data of bioreactor B for testing, without (**a**) and with SMOTE (**b**) for balancing the oversampled datasets. **c,d**, prediction of C8 productivity using the relative abundance data of bioreactor A for training the models and data of bioreactor B for testing, without (**c**) and with SMOTE (**d**) for balancing. **e,f**, prediction of C6 productivity using the relative abundance data of bioreactor B for training the models and data of bioreactor A for testing, without (**e**) and with SMOTE (**f**) for balancing. **g,h**, prediction of C8 productivity using the relative abundance data of bioreactor B for training the models and data of bioreactor A for testing, without (**g**) and with SMOTE (**h**) for balancing. LM, linear regression; KSVM, support vector machine with radial kernel; RF, random forest regression.

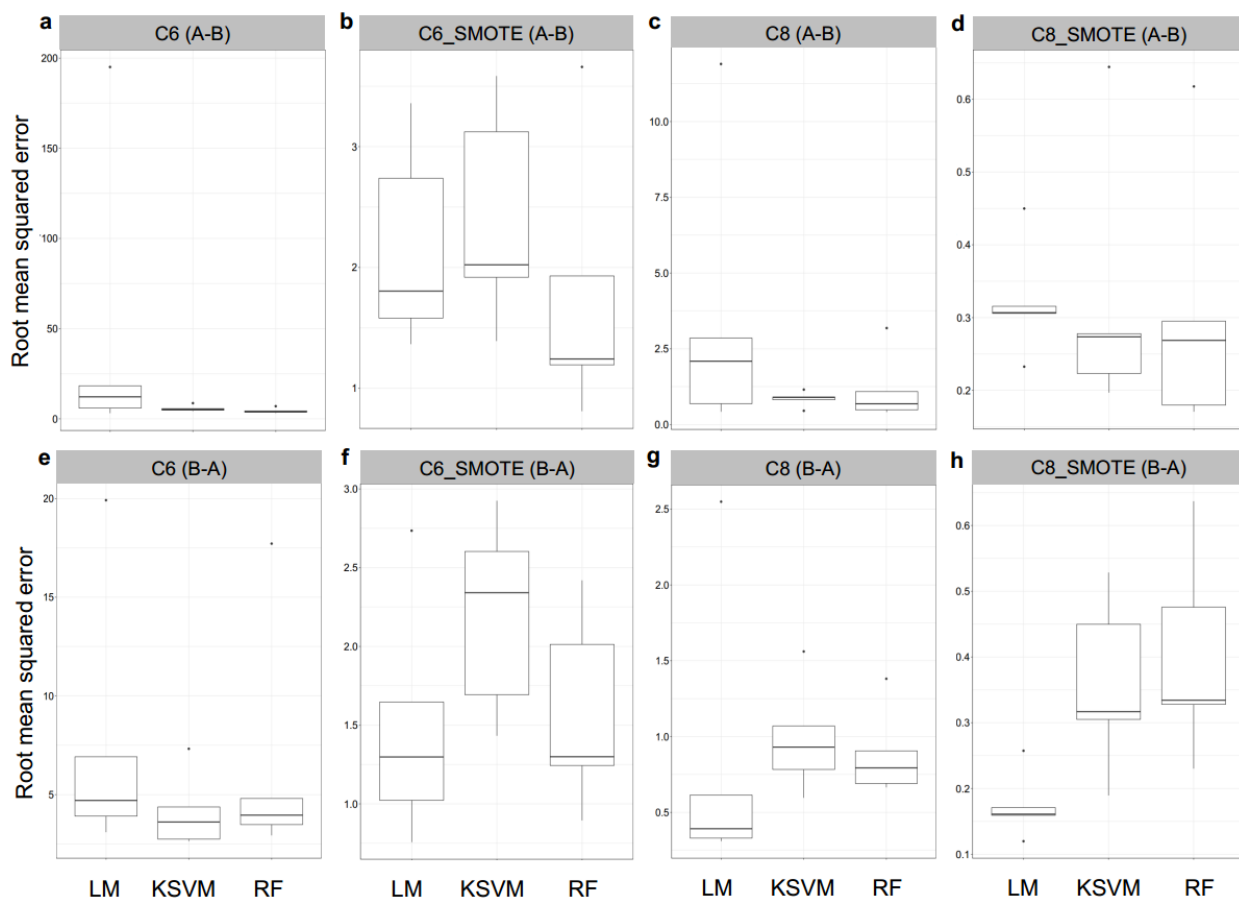

**Figure S6. Predictive performance of three machine learning algorithms using non-HRT bioindicators for considering community assembly caused by time. a,b,** prediction of C6 productivity using the relative abundance data of bioreactor A for training the models and data of bioreactor B for testing, without (**a**) and with SMOTE (**b**) for balancing the oversampled datasets. **c,d,** prediction of C8 productivity using the relative abundance data of bioreactor A for training the models and data of bioreactor B for testing, without (**c**) and with SMOTE (**d**) for balancing. **e,f,** prediction of C6 productivity using the relative abundance data of bioreactor B for training the models and data of bioreactor A for testing, without (**e**) and with SMOTE (**f**) for balancing. **g,h,** prediction of C8 productivity using the relative abundance data of bioreactor B for training the models and data of bioreactor A for testing, without (**g**) and with SMOTE (**h**) for balancing. LM, linear regression; KSVM, support vector machine with radial kernel; RF, random forest regression.

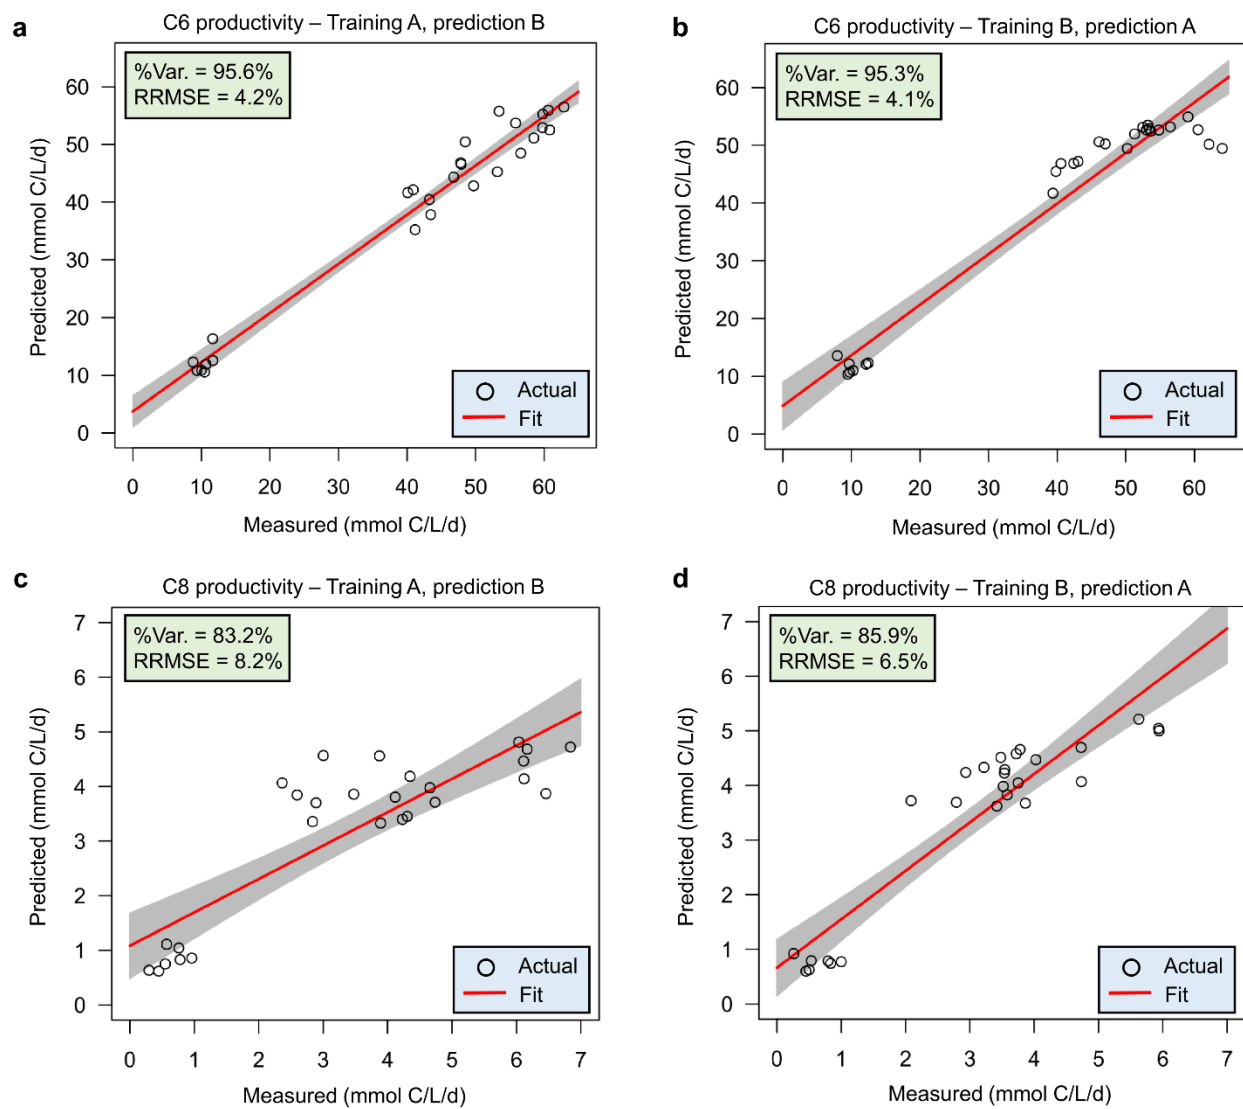

**Figure S7. Prediction results of C6 and C8 productivities using non-HRT bioindicators for considering community assembly caused by time. a,b,** Prediction performance using C6 productivity bioindicators of bioreactors A and B. **c,d,** Prediction performance using C8 productivity bioindicators of bioreactors A and B. Results in **a** and **c** were obtained by using the relative abundance data of bioreactor A for training the models and data of bioreactor B for testing. Results using the data of bioreactor B for training and bioreactor A for testing are shown in **b** and **d**. % Var., explains the variance (%) in C6/C8 productivity of the training set. RRMSE, relative root mean square error.

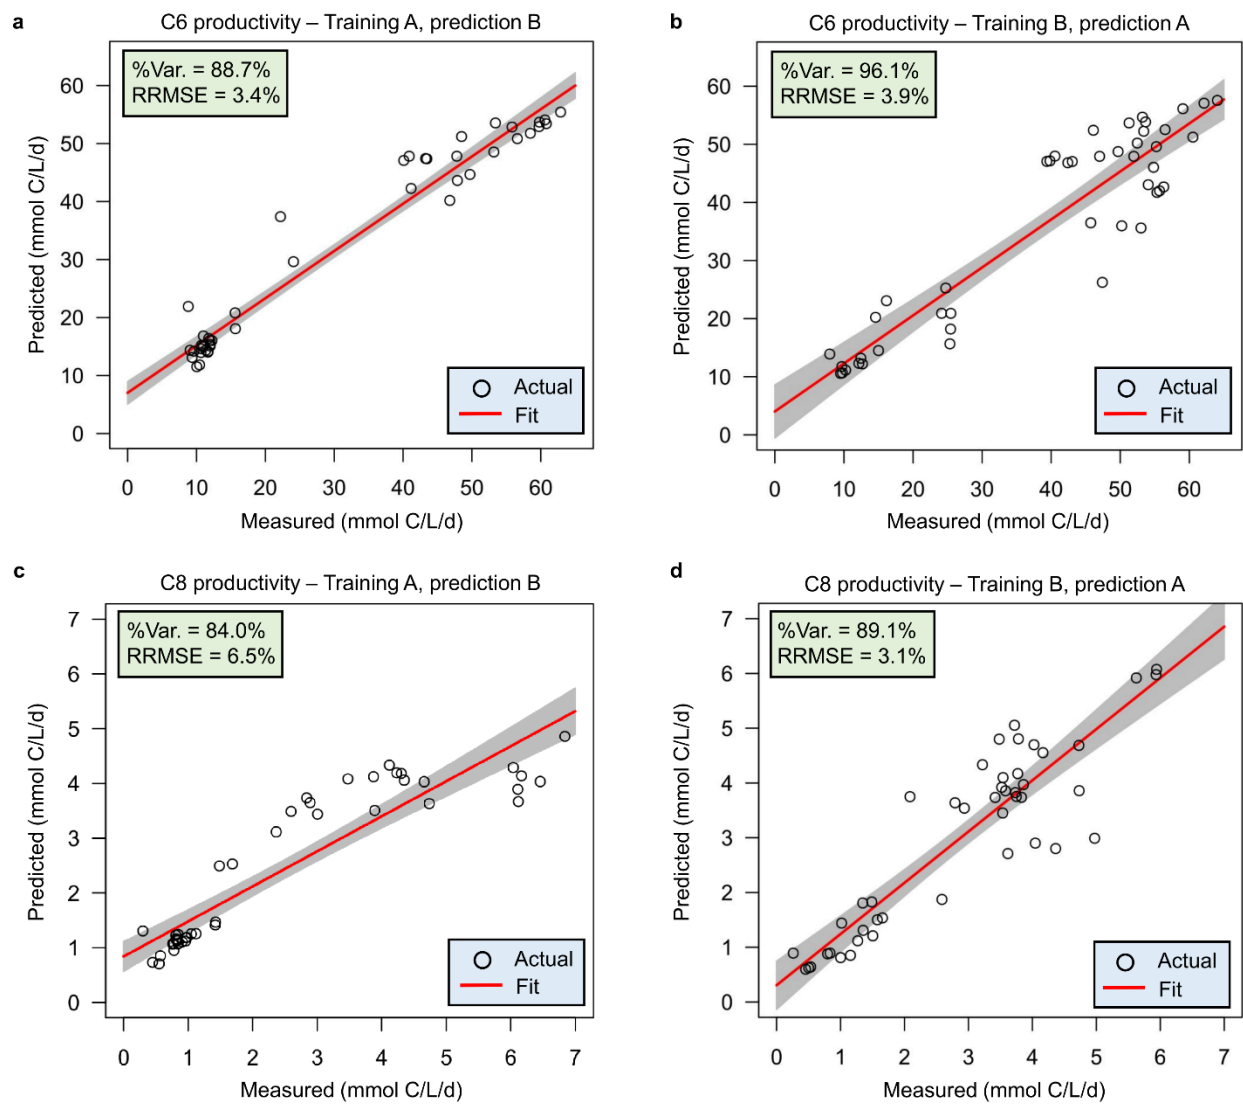

**Figure S8. Prediction results of C6 and C8 productivities for all samples in the four HRT phases using HRT bioindicators. a,b,** Prediction performance of C6 productivity. **c,d,** Prediction performance of C8 productivity. Results in **a** and **c** were obtained by using the relative abundance data of bioreactor A for training the models and data of bioreactor B for testing. Results using data of bioreactor B for training and bioreactor A for testing are shown in **b** and **d**. % Var., explains the variance (%) in C6/C8 productivity of the training set. RRMSE, relative root mean square error.

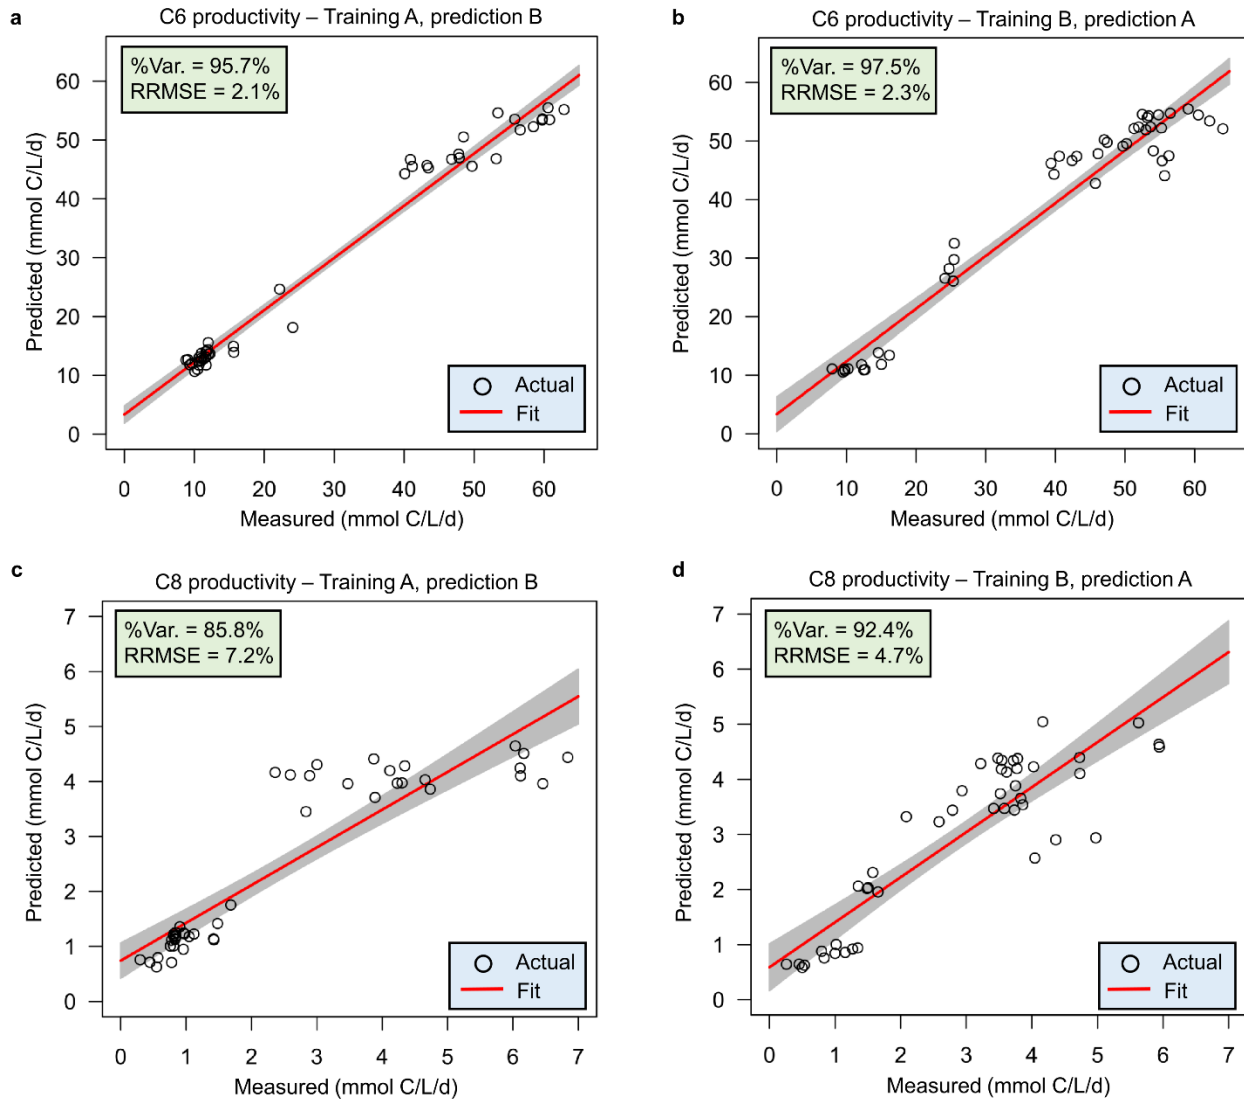

**Figure S9. Prediction results of C6 and C8 productivities for all samples in the four HRT phases using non-HRT bioindicators for considering community assembly caused by time.**

**a,b,** Prediction performance using C6 productivity bioindicators of bioreactors A and B. **c,d,**

Prediction performance using C8 productivity bioindicators of bioreactors A and B. Results in **a** and **c** were obtained by using the relative abundance data of bioreactor A for training the models and data of bioreactor B for testing. Results using the data of bioreactor B for training and bioreactor A for testing are shown in **b** and **d**. % Var., explains the variance (%) in C6/C8 productivity of the training set. RRMSE, relative root mean square error.

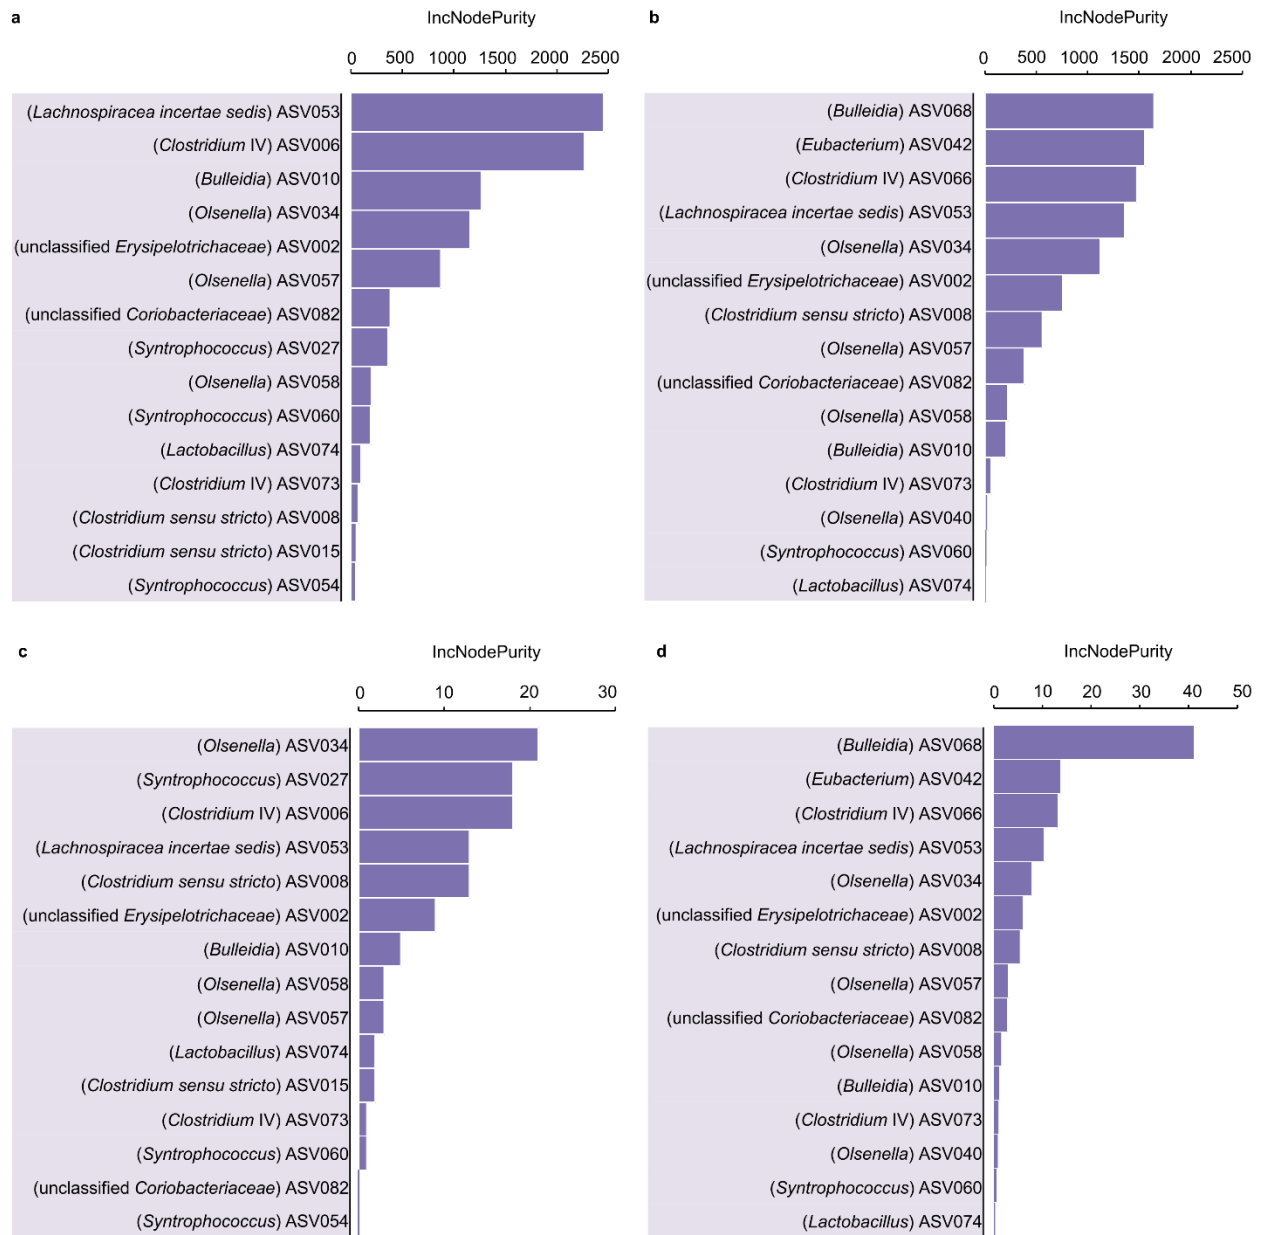

**Figure S10. Random forest feature importance of A-HRT bioindicators and B-HRT bioindicators used to predict C6 and C8 productivities. a,** Feature importance of A-HRT bioindicators in the prediction of C6 productivity. **b,** Feature importance of B-HRT bioindicators in the prediction of C6 productivity. **c,** Feature importance of A-HRT bioindicators in the prediction of C8 productivity. **d,** Feature importance of B-HRT bioindicators in the prediction of C8 productivity. IncNodePurity, residual sum of squares.

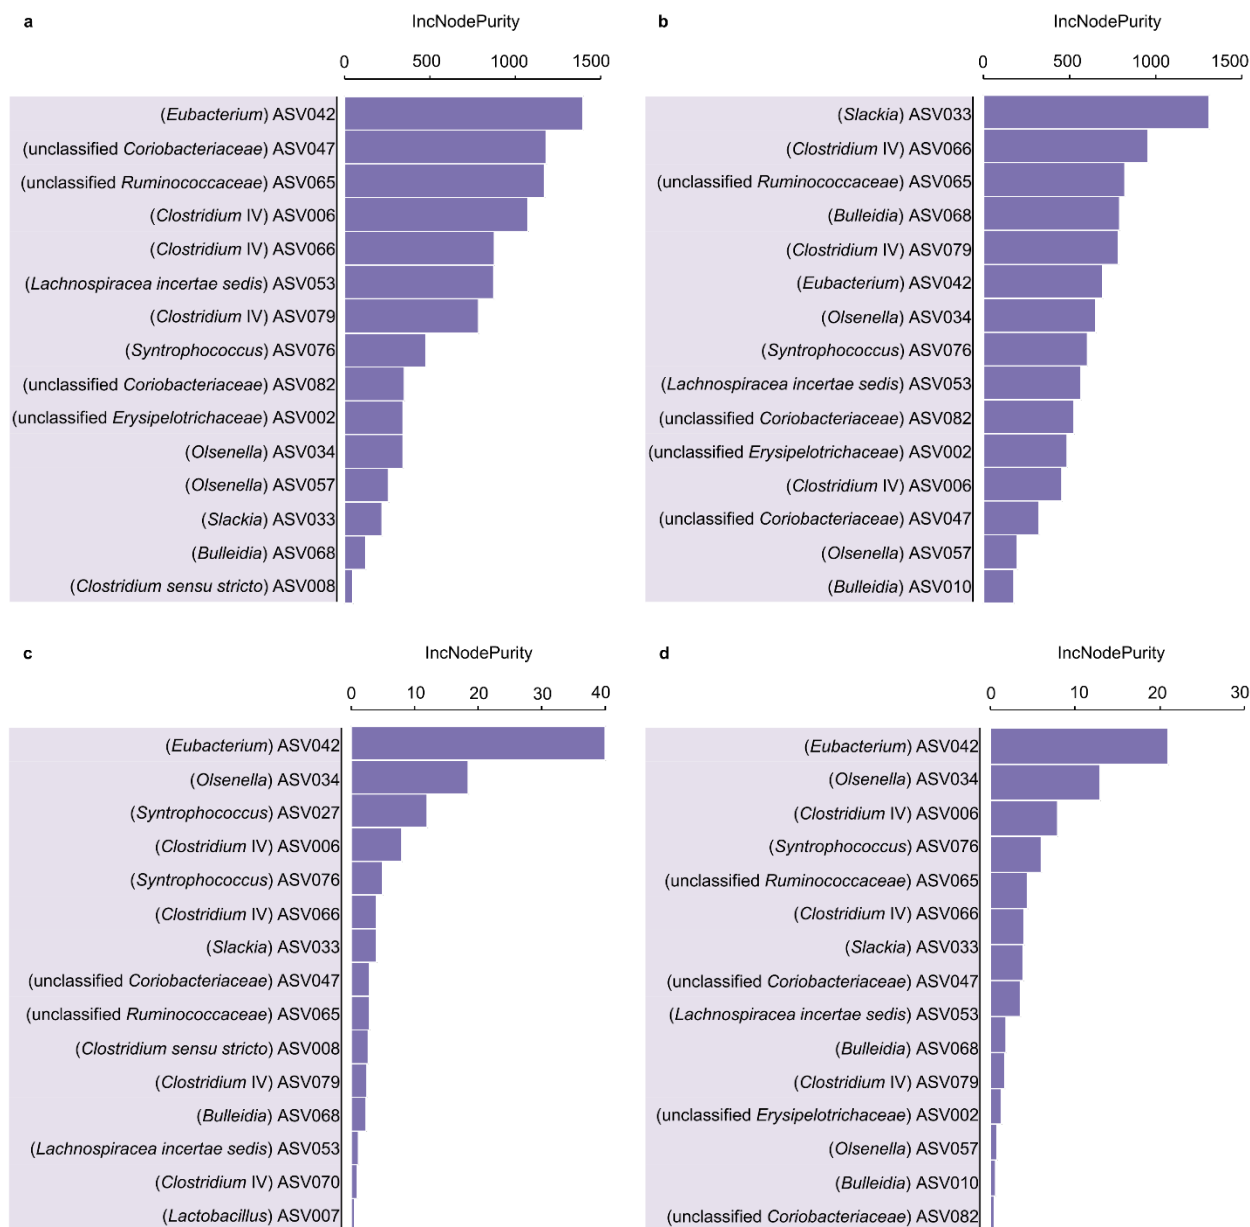

**Figure S11. Random forest feature importance of the non-HRT bioindicators used to predict C6 and C8 productivities. a,b,** The feature importance of C6 productivity bioindicators of bioreactors A and B. **c,d,** The feature importance C8 productivity bioindicators of bioreactors A and B. Relative abundance data of bioreactor A were used as training set and that of bioreactor B as test set (**a,c**); while data of bioreactor B for training and that of bioreactor A for testing (**b,d**). IncNodePurity, residual sum of squares.

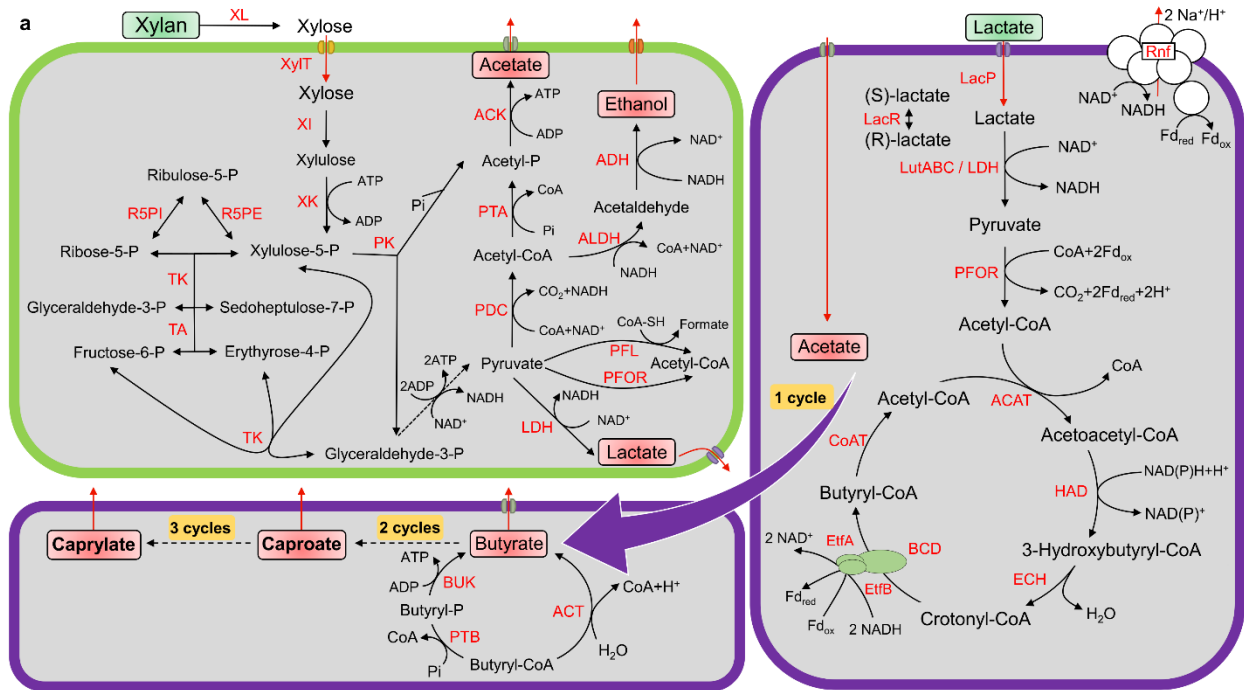

**b**

| Predicted function      | No. | Enzyme abbreviation | EC number               | Enzyme                                               |
|-------------------------|-----|---------------------|-------------------------|------------------------------------------------------|
| Xylan degradation       | 1   | XL                  | 3.2.1.8                 | xylanase                                             |
|                         | 2   | XylIT               | 7.5.2.10;7.5.2.13       | xylose transporter                                   |
|                         | 3   | XI                  | 5.3.1.5                 | xylose isomerase                                     |
|                         | 4   | XK                  | 2.7.1.17                | xylose kinase                                        |
| Xylose utilization      | 5   | R5PE                | 5.1.3.1                 | ribulose-5-phosphoate epimerase                      |
|                         | 6   | R5PI                | 5.3.1.6                 | ribose-5-phosphate isomerase                         |
|                         | 7   | TA                  | 2.2.1.2                 | transaldolase                                        |
|                         | 8   | TK                  | 2.2.1.1                 | transketolase                                        |
|                         | 9   | PK                  | 4.1.2.9                 | D-xylulose 5-phosphate phosphoketolase               |
|                         | 10  | PDC                 | 1.2.4.1;2.3.1.2;1.8.1.4 | pyruvate dehydrogenase complex                       |
|                         | 11  | PFOR                | 1.2.7.-                 | pyruvate flavodoxin oxidoreductase                   |
|                         | 12  | PFL                 | 2.3.1.54                | formate C-acetyltransferase (pyruvate formate lyase) |
|                         | 13  | ALDH                | 1.2.1.10                | acetaldehyde dehydrogenase                           |
| Pyruvate transformation | 14  | ADH                 | 1.1.1.1                 | alcohol dehydrogenase                                |
|                         | 15  | PTA                 | 2.3.1.8                 | phosphate acetyltransferase                          |
|                         | 16  | ACK                 | 2.7.2.1                 | acetate kinase                                       |
|                         | 17  | LDH                 | 1.1.1.27;1.1.1.28       | lactate dehydrogenase                                |
|                         | 18  | PTB                 | 2.3.1.19                | phosphate butyryltransferase                         |
|                         | 19  | BUK                 | 2.7.2.7                 | butyrate kinase                                      |

**c**

| Predicted function         | No. | Enzyme abbreviation | EC number           | Enzyme                                            |
|----------------------------|-----|---------------------|---------------------|---------------------------------------------------|
| Lactate utilization        | 1   | LacR                | 5.1.2.1             | lactate racemase                                  |
|                            | 2   | LacP                | 2.A.14              | lactate permease                                  |
|                            | 3   | LutABC              |                     | lactate utilization protein ABC                   |
| Acetyl-CoA formation       | 4   | LDH                 | 1.1.1.27            | lactate dehydrogenase                             |
|                            | 5   | PFOR                | 1.2.7.1             | pyruvate ferredoxin oxidoreductase                |
|                            | 6   | ACAT                | 2.3.1.9, 2.3.1.16   | acetyl-CoA acetyltransferase                      |
|                            | 7   | HAD                 | 1.1.1.157, 1.1.1.35 | 3-hydroxyacyl-CoA dehydrogenase                   |
|                            | 8   | ECH                 | 4.2.1.150, 4.2.1.55 | enoyl-CoA hydratase                               |
| Reverse $\beta$ -oxidation | 9   | BCD                 | 1.3.8.1             | butyryl-CoA dehydrogenase                         |
|                            | 10  | EtfAB               |                     | electron transfer flavoprotein A,B                |
|                            | 11  | CoAT                | 2.8.3.-             | butyryl-CoA:acetate CoA-transferase               |
|                            | 12  | ACT                 | 3.1.2.20            | acyl-CoA thioesterase                             |
| Energy conservation        | 13  | RnfABCDEG           | 7.1.1.1             | energy-converting NADH: ferredoxin oxidoreductase |



**Figure S12. Metabolic pathways involved in converting lactate and xylan to *n*-caproate and *n*-caprylate.** **a**, The pathways involved in the processes of anaerobic mixed culture fermentation include hydrolysis of xylan (more than 95% xylooligosaccharides), fermentation of xylose and chain elongation with lactate as electron donor. The enzyme abbreviations are provided in red letters next to the pathways (solid lines). **b**, Enzymes of the predicted functions related to xylan hydrolysis, xylose fermentation and pyruvate transformation. **c**, Enzymes of the predicted functions related to chain elongation with lactate as electron donor. Dashed lines represent multi-enzyme reactions between the two indicated molecules. In **(a)**, “cycle” refers to the reverse  $\beta$ -oxidation cycle. The functional annotation of metagenome-assembled genomes (MAGs) with the same taxonomy as HRT bioindicators can be found in Additional file 3: Dataset S2 (for xylan hydrolysis and xylose fermentation) and Additional file 4: Dataset S3 (for chain elongation). The functional annotation of all MAGs can be found in Additional file 5: Dataset S4 (for xylan hydrolysis and xylose fermentation) and Additional file 6: Dataset S5 (for chain elongation).

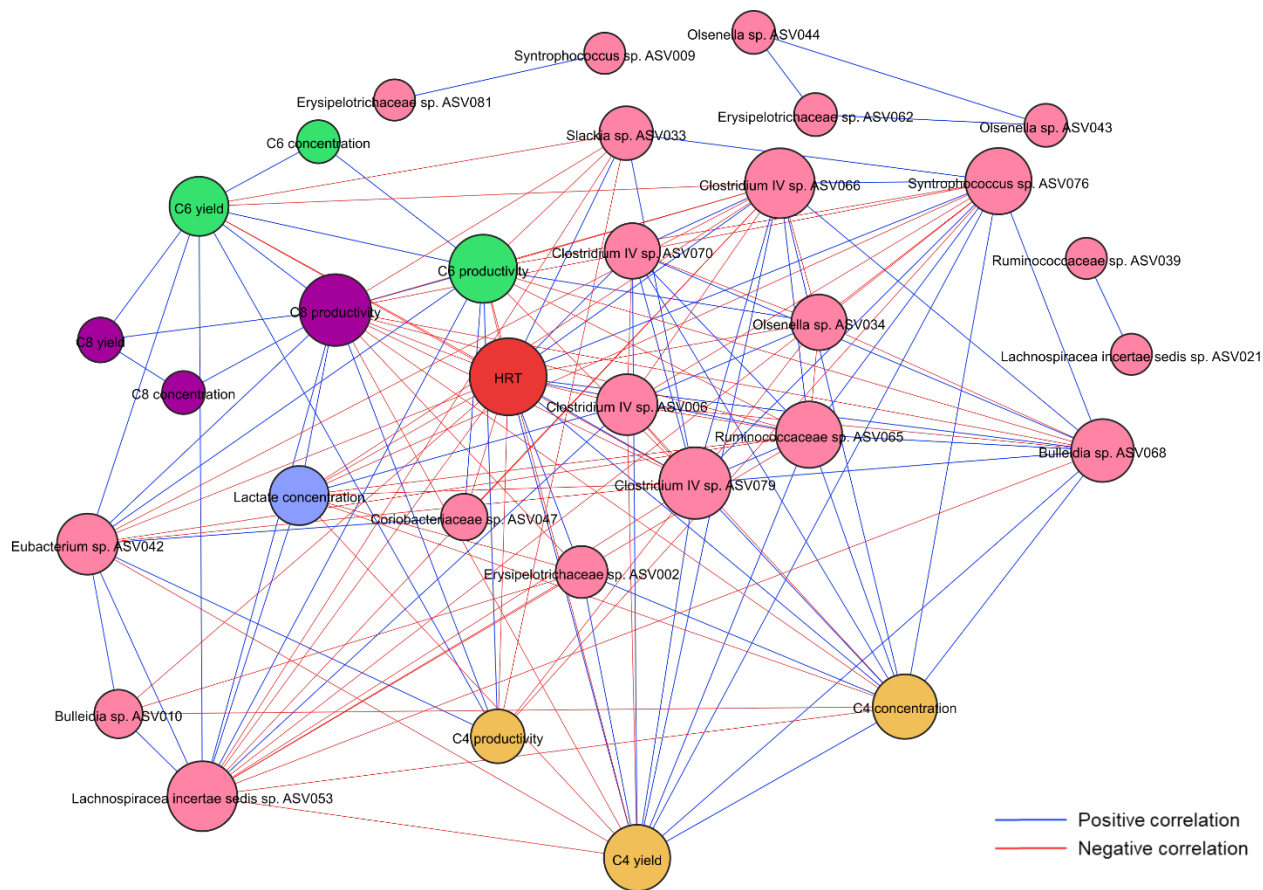

**Figure S13. Correlation network of environmental factors, process performance and microbial community.** Edges indicate the Spearman coefficient  $> 0.7$  for positive correlations (blue edges) and  $< 0.7$  for negative correlations (red edges). Node size was scaled to represent its degree of connectedness. Here, the environmental factors represent controlled operational parameters with only reducing the HRT, and the process performance refers to the concentration, productivity and yield of the target products. C4, *n*-butyrate; C6, *n*-caproate; C8, *n*-caprylate.

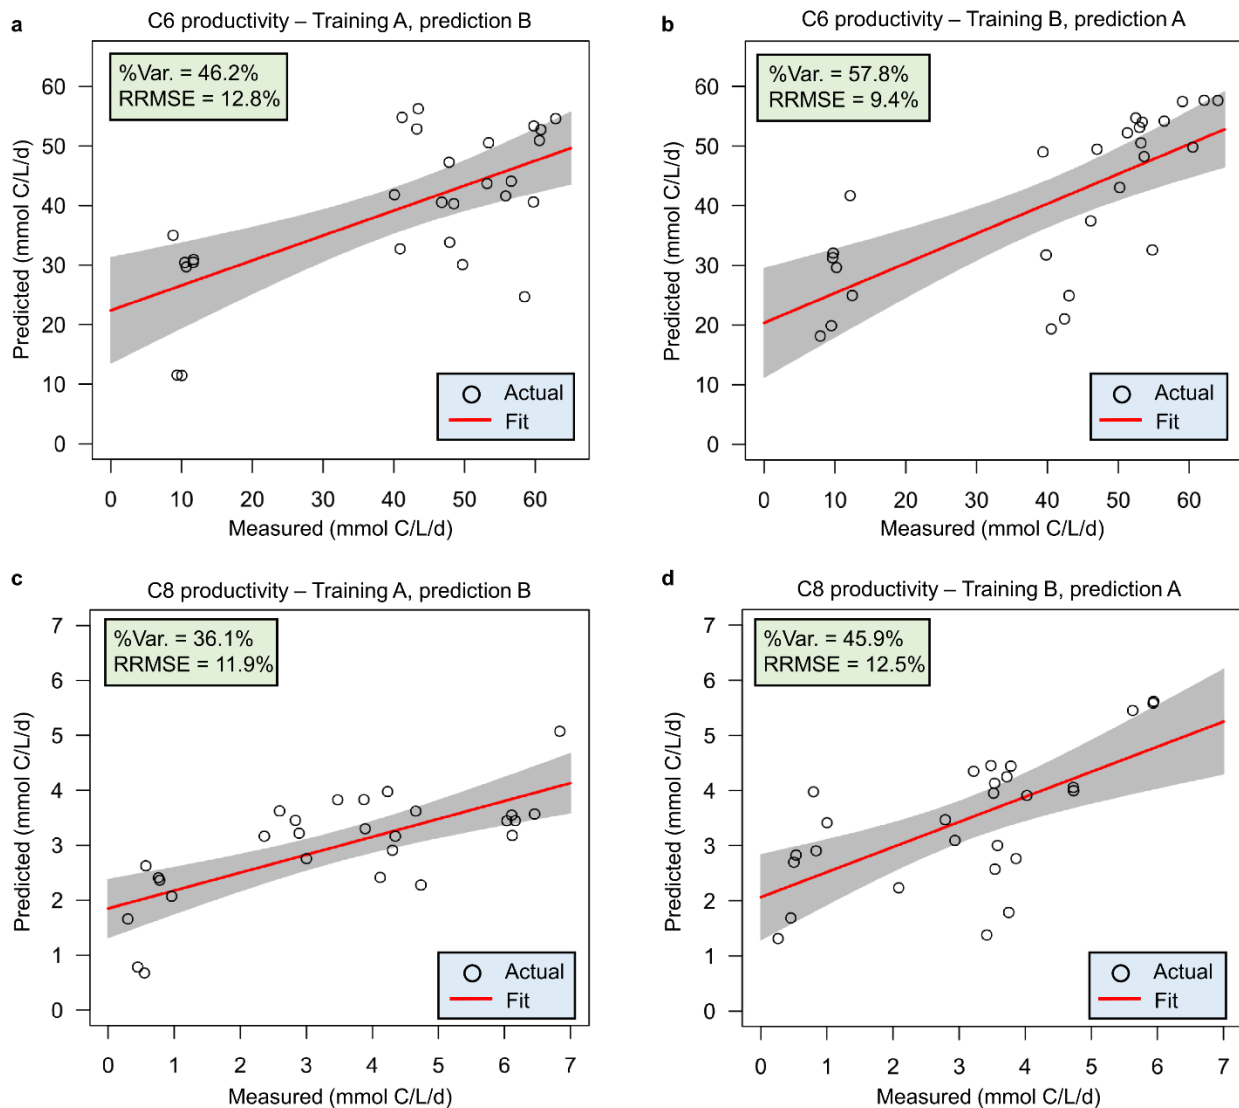

**Figure S14. Prediction results of C6 and C8 productivities for all samples in the four HRT phases using the four ASVs of HRT bioindicators irrespective of time. a,b,** Prediction performance of C6 productivity. **c,d,** Prediction performance of C8 productivity. Results in **a** and **c** were obtained by using the relative abundance data of bioreactor A for training the models and data of bioreactor B for testing. Results using the data of bioreactor B for training and bioreactor A for testing are shown in **b** and **d**. % Var., explains the variance (%) in C6/C8 productivity of the training set. RRMSE, relative root mean square error.

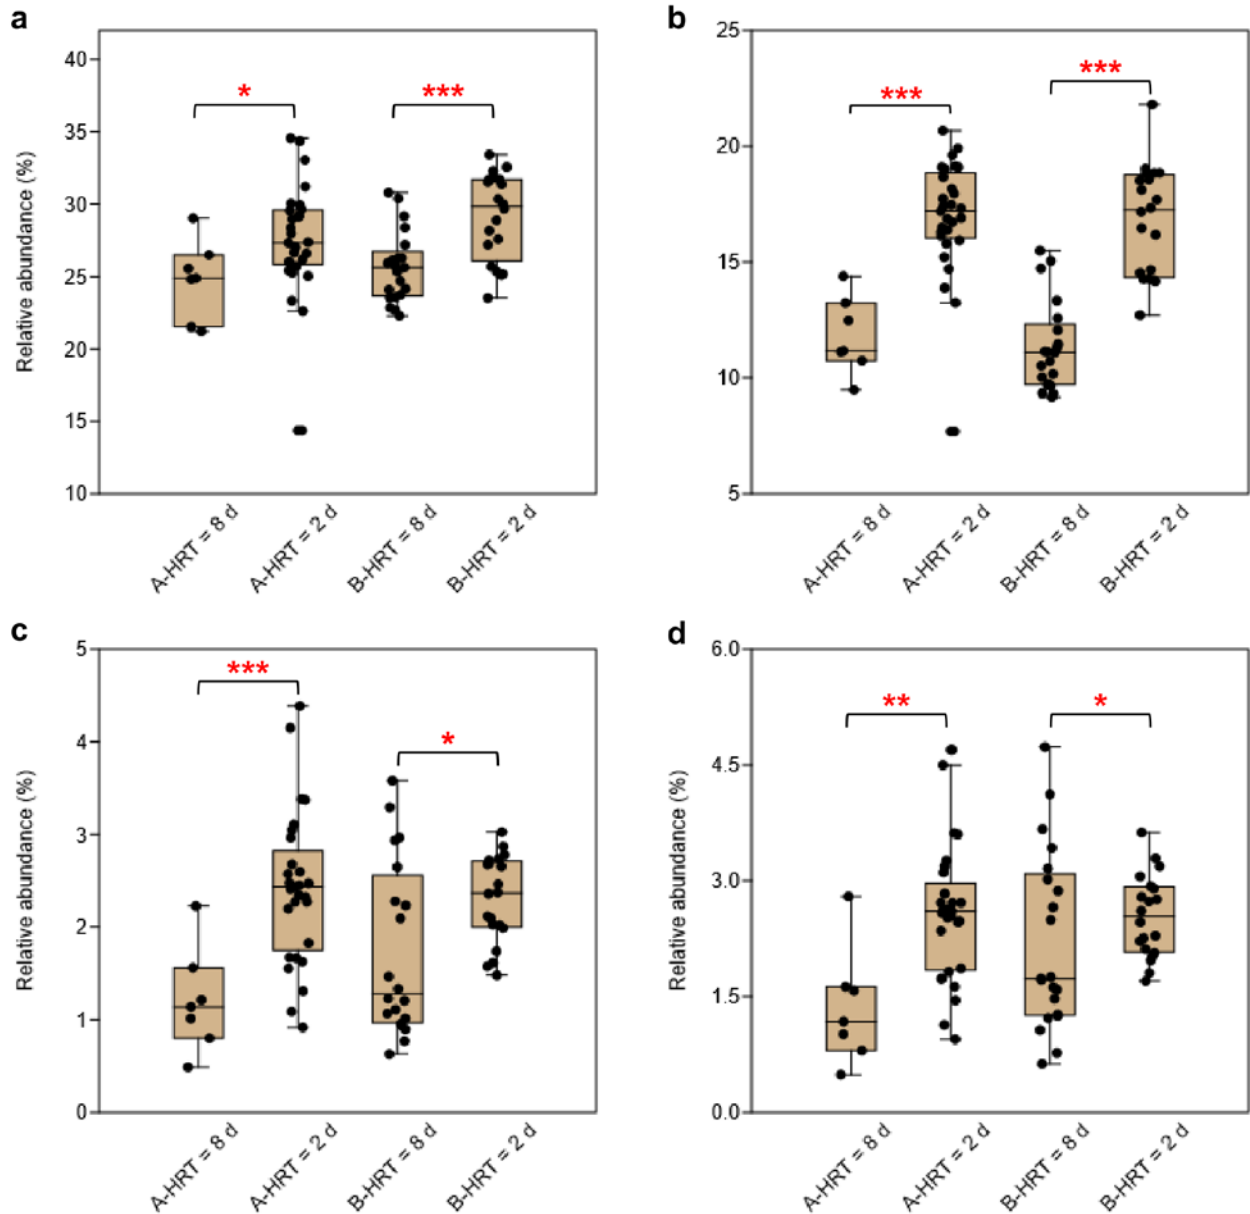

**Figure S15. Reducing HRT increases abundances of HRT bioindicators driving the catabolism of xylan and lactate to *n*-caproate and *n*-caprylate.** These catabolic steps were categorised into four main functions of the anaerobic mixed culture fermentation. **a**, Hydrolysis of xylan. Relevant HRT bioindicators are *Olsenella* sp. ASV034, *Olsenella* sp. ASV057, *Olsenella* sp. ASV058, unclassified *Erysipelotrichaceae* sp. ASV002, *Bulleidia* sp. ASV010, *Lachnospiracea incertae sedis* ASV053, *Syntrophococcus* sp. ASV060 and *Clostridium* IV sp.

ASV073. **b**, Xylose fermentation producing acetate and lactate. Relevant HRT bioindicators are *Olsenella* sp. ASV034, *Olsenella* sp. ASV057, *Olsenella* sp. ASV058 and *Lactobacillus* sp. ASV074. **c**, Butyrate formation from lactate and acetate. Relevant HRT bioindicators are *Syntrophococcus* sp. ASV060 and *Clostridium sensu stricto* sp. ASV008. **d**, Chain elongation with lactate as electron donor producing *n*-butyrate, *n*-caproate and *n*-caprylate. Relevant HRT bioindicators are *Syntrophococcus* sp. ASV060, *Clostridium* IV sp. ASV073 and *Clostridium sensu stricto* sp. ASV008. The rarefied ASV abundances were calculated using 16S rRNA amplicon sequencing data. Boxes represent the interquartile range between the 25th and 75th percentiles, respectively, the line inside denote the median value, and asterisks indicate significant different mean values (adjusted  $P^{***} < 0.001 < ** < 0.01 < * < 0.05$ ), which is tested by permutational Student's *t*-test with 9,999 simulations. On the horizontal axis, A and B stand for bioreactors A and B, respectively.

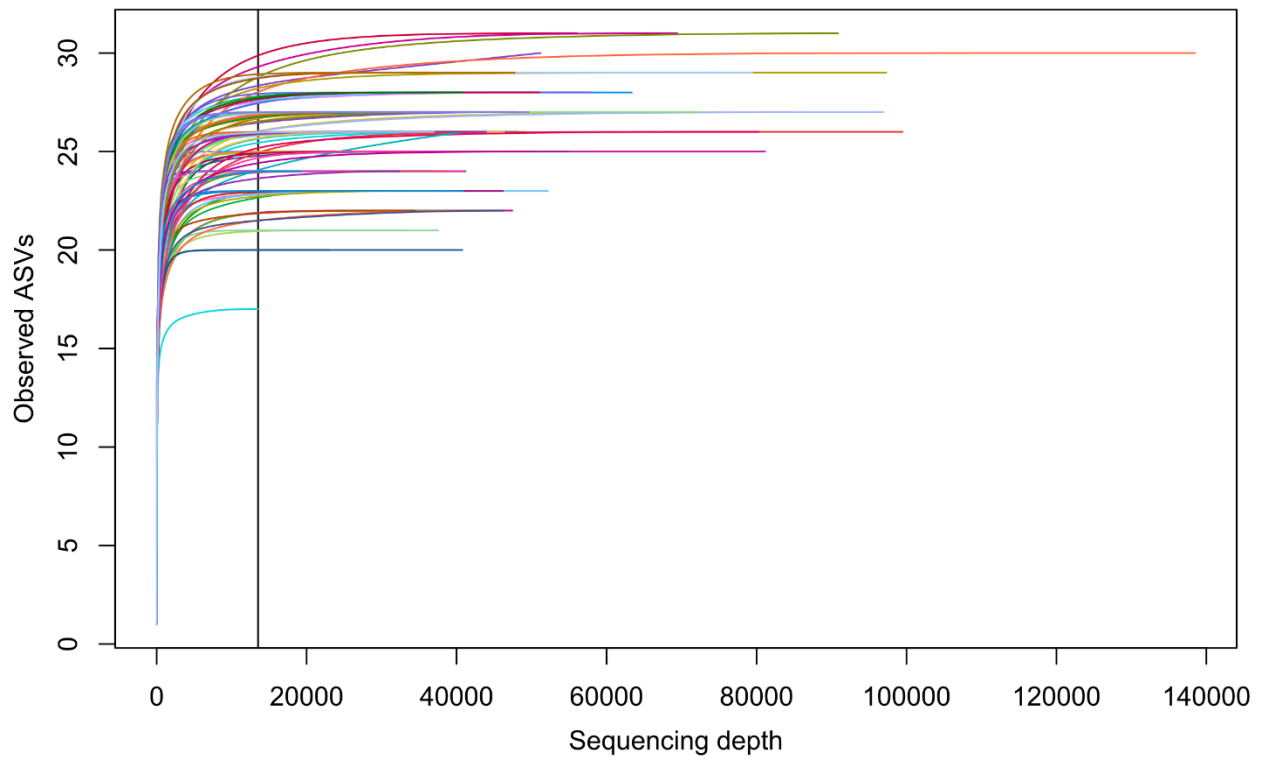

**Figure S16. Alpha rarefaction curves.** ASVs of all samples were rarefied to an equal sequencing depth of 13,518 reads. Colours represent the different samples.

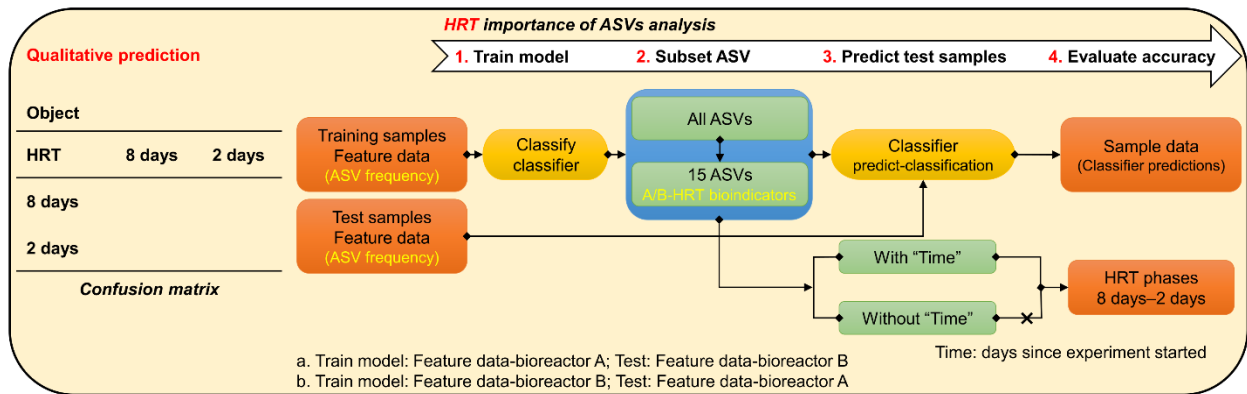

**Figure S17. Workflow of the random forest classification analysis.** The qualitative prediction of HRT phases of 8 days and 2 days. Letters in yellow show the input (ASV frequency) and output (A/B-HRT bioindicators) of the model.

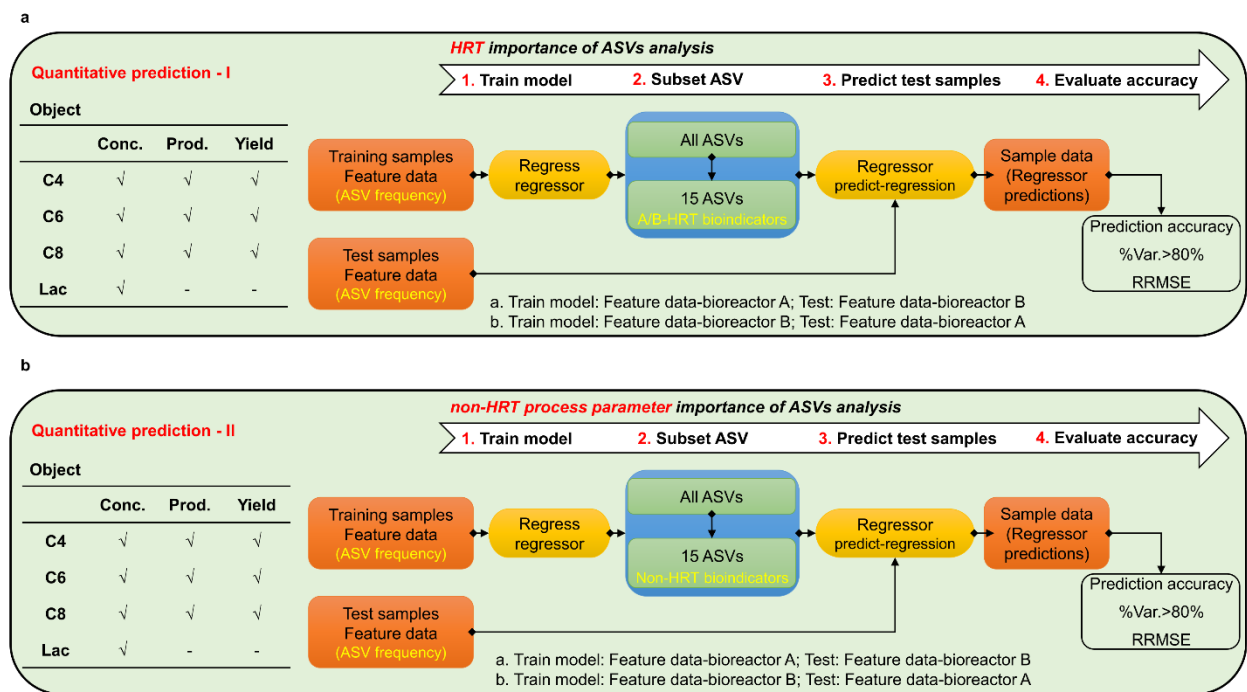

**Figure S18. Workflow of a two-step random forest regression analysis.** **a**, The first step of quantitative predictions using HRT bioindicators. **b**, The second step of quantitative predictions using non-HRT bioindicators for considering community assembly caused by time. Lac, lactate; Conc., concentration; Prod., productivity; % Var., explains the variance (%) in process parameters of the training set. RRMSE, relative root mean square error.

**Table S1. Mean carboxylate yields (i.e. C mole product to substrate ratios) at HRTs of 8 days and 2 days (stable production period).**

| <b>Bioreactor</b> | <b>HRT<br/>(d)</b> | <b>Duration<br/>(d)</b> | <b>C4<br/>(mmol C/mmol C)</b> | <b>C6<br/>(mmol C/mmol C)</b> | <b>C8<br/>(mmol C/mmol C)</b> |
|-------------------|--------------------|-------------------------|-------------------------------|-------------------------------|-------------------------------|
| A                 | 8                  | 0-51                    | 39.1                          | 11.6                          | 0.7                           |
|                   | 2                  | 162-211                 | 26.8                          | 16.9                          | 1.3                           |
| B                 | 8                  | 0-123                   | 39.6                          | 12.3                          | 0.9                           |
|                   | 2                  | 193-211                 | 22.3                          | 18.7                          | 2.0                           |



**Table S2. Explained variances of the training set in the regression-based prediction of process parameters using A-HRT bioindicators and B-HRT bioindicators.** Features (ASVs) explaining more than 80% of the variance in a process parameter are indicated in green. A and B stand for bioreactors A and B, respectively.

| Training set        | Predicted variable | Set of ASVs         | Number of ASVs | Explained variance (%) |
|---------------------|--------------------|---------------------|----------------|------------------------|
| Bioreactor A        | concentration      | C4 ASV_all          | 71             | 89.37 ± 0.48           |
|                     |                    | A-HRT bioindicators | 15             | 87.81 ± 0.54           |
|                     |                    | C6 ASV_all          | 71             | 67.66 ± 0.84           |
|                     |                    | A-HRT bioindicators | 15             | 68.06 ± 0.84           |
|                     |                    | C8 ASV_all          | 71             | 58.43 ± 0.91           |
|                     |                    | A-HRT bioindicators | 15             | 59.30 ± 1.00           |
|                     | Lactate            | ASV_all             | 71             | 77.30 ± 0.79           |
|                     |                    | A-HRT bioindicators | 15             | 78.20 ± 0.77           |
|                     | productivity       | C4 ASV_all          | 71             | 88.61 ± 0.41           |
|                     |                    | A-HRT bioindicators | 15             | 88.94 ± 0.35           |
|                     |                    | C6 ASV_all          | 71             | 93.80 ± 0.45           |
|                     |                    | A-HRT bioindicators | 15             | 95.87 ± 0.23           |
|                     |                    | C8 ASV_all          | 71             | 80.91 ± 0.78           |
|                     |                    | A-HRT bioindicators | 15             | 86.62 ± 0.51           |
|                     | yield              | C4 ASV_all          | 71             | 85.39 ± 0.58           |
|                     |                    | A-HRT bioindicators | 15             | 80.81 ± 0.73           |
| C6 ASV_all          |                    | 71                  | 73.81 ± 0.64   |                        |
| A-HRT bioindicators |                    | 15                  | 54.62 ± 0.98   |                        |
| C8 ASV_all          |                    | 71                  | 60.50 ± 0.81   |                        |
| A-HRT bioindicators |                    | 15                  | 56.84 ± 0.92   |                        |
| Bioreactor B        | concentration      | C4 ASV_all          | 71             | 79.49 ± 0.49           |
|                     |                    | B-HRT bioindicators | 15             | 78.61 ± 0.63           |
|                     |                    | C6 ASV_all          | 71             | 73.94 ± 0.54           |
|                     |                    | B-HRT bioindicators | 15             | 77.11 ± 0.50           |
|                     |                    | C8 ASV_all          | 71             | 62.37 ± 0.75           |
|                     |                    | B-HRT bioindicators | 15             | 63.64 ± 0.83           |
|                     | Lactate            | ASV_all             | 71             | 68.64 ± 0.85           |
|                     |                    | B-HRT bioindicators | 15             | 72.02 ± 0.66           |
|                     | productivity       | C4 ASV_all          | 71             | 65.90 ± 0.63           |
|                     |                    | B-HRT bioindicators | 15             | 67.91 ± 0.58           |
|                     |                    | C6 ASV_all          | 71             | 93.92 ± 0.36           |
|                     |                    | B-HRT bioindicators | 15             | 93.44 ± 0.37           |
|                     |                    | C8 ASV_all          | 71             | 84.37 ± 0.68           |
|                     |                    | B-HRT bioindicators | 15             | 85.65 ± 0.58           |
|                     | yield              | C4 ASV_all          | 71             | 68.67 ± 0.82           |
|                     |                    | B-HRT bioindicators | 15             | 70.99 ± 0.49           |
| C6 ASV_all          |                    | 71                  | 73.57 ± 0.54   |                        |
| B-HRT bioindicators |                    | 15                  | 78.17 ± 0.41   |                        |
| C8 ASV_all          |                    | 71                  | 65.75 ± 0.83   |                        |
| B-HRT bioindicators |                    | 15                  | 67.19 ± 0.93   |                        |

*Note.* Explained variances of the variable observed ASVs were lower than 60% in all cases.

**Table S3. Explained variances of the training set in the regression-based prediction of process parameters using non-HRT bioindicators for considering community assembly caused by time.** Features (ASVs) explaining more than 80% of the variance in a process parameter are indicated in green. A and B stand for bioreactors A and B, respectively.

| Training set        | Predicted variable | Set of ASVs          | Number of ASVs | Explained variance (%) |
|---------------------|--------------------|----------------------|----------------|------------------------|
| Bioreactor A        | concentration      | C4 ASV_all           | 71             | 89.37 ± 0.48           |
|                     |                    | A-C4c_bioindicators  | 15             | 91.69 ± 0.25           |
|                     |                    | C6 ASV_all           | 71             | 67.66 ± 0.84           |
|                     |                    | A-C6c_bioindicators  | 15             | 70.72 ± 0.57           |
|                     |                    | C8 ASV_all           | 71             | 58.43 ± 0.91           |
|                     |                    | A-C8c_bioindicators  | 15             | 63.95 ± 0.54           |
|                     | Lactate            | ASV_all              | 71             | 77.30 ± 0.79           |
|                     |                    | A-LACc_bioindicators | 15             | 79.38 ± 0.53           |
|                     | productivity       | C4 ASV_all           | 71             | 88.61 ± 0.41           |
|                     |                    | A-C4p_bioindicators  | 15             | 88.83 ± 0.26           |
|                     |                    | C6 ASV_all           | 71             | 93.80 ± 0.45           |
|                     |                    | A-C6p_bioindicators  | 15             | 95.64 ± 0.20           |
|                     |                    | C8 ASV_all           | 71             | 80.91 ± 0.78           |
|                     |                    | A-C8p_bioindicators  | 15             | 83.20 ± 0.48           |
|                     | yield              | C4 ASV_all           | 71             | 85.39 ± 0.58           |
|                     |                    | A-C4y_bioindicators  | 15             | 87.07 ± 0.36           |
| C6 ASV_all          |                    | 71                   | 73.81 ± 0.64   |                        |
| A-C6y_bioindicators |                    | 15                   | 74.73 ± 0.40   |                        |
| C8 ASV_all          |                    | 71                   | 60.50 ± 0.81   |                        |
| A-C8y_bioindicators |                    | 15                   | 61.85 ± 0.66   |                        |
| Bioreactor B        | concentration      | C4 ASV_all           | 71             | 79.49 ± 0.49           |
|                     |                    | B-C4c_bioindicators  | 15             | 81.50 ± 0.33           |
|                     |                    | C6 ASV_all           | 71             | 73.94 ± 0.54           |
|                     |                    | B-C6c_bioindicators  | 15             | 75.15 ± 0.36           |
|                     |                    | C8 ASV_all           | 71             | 62.37 ± 0.75           |
|                     |                    | B-C8c_bioindicators  | 15             | 64.35 ± 0.57           |
|                     | Lactate            | ASV_all              | 71             | 68.64 ± 0.85           |
|                     |                    | B-LACc_bioindicators | 15             | 71.16 ± 0.51           |
|                     | productivity       | C4 ASV_all           | 71             | 65.90 ± 0.63           |
|                     |                    | B-C4p_bioindicators  | 15             | 67.90 ± 0.41           |
|                     |                    | C6 ASV_all           | 71             | 93.92 ± 0.36           |
|                     |                    | B-C6p_bioindicators  | 15             | 95.25 ± 0.24           |
|                     |                    | C8 ASV_all           | 71             | 84.37 ± 0.68           |
|                     |                    | B-C8p_bioindicators  | 15             | 85.90 ± 0.53           |
|                     | yield              | C4 ASV_all           | 71             | 68.67 ± 0.82           |
|                     |                    | B-C4y_bioindicators  | 15             | 71.17 ± 0.46           |
| C6 ASV_all          |                    | 71                   | 73.57 ± 0.54   |                        |
| B-C6y_bioindicators |                    | 15                   | 74.70 ± 0.35   |                        |
| C8 ASV_all          |                    | 71                   | 65.75 ± 0.83   |                        |
| B-C8y_bioindicators |                    | 15                   | 67.84 ± 0.52   |                        |

*Note.* Explained variances of the variable observed ASVs were lower than 60% in all cases.

**Table S4. Growth medium used for the reactor operation.** The medium was anoxic by flushing with nitrogen and adjusted to pH 5.5 with 1 M sodium hydroxide solution.

| Concentrations (all components were prepared completely sterile): |                                        |                              |                  |
|-------------------------------------------------------------------|----------------------------------------|------------------------------|------------------|
| 0.054 g/L                                                         | MgCl <sub>2</sub> × 6 H <sub>2</sub> O |                              |                  |
| 0.065 g/L                                                         | CaCl <sub>2</sub> × 2 H <sub>2</sub> O |                              |                  |
| 0.474 g/L                                                         | NH <sub>4</sub> Cl                     |                              |                  |
| 0.5 g/L                                                           | Yeast extract                          |                              |                  |
| 10.94 g/L                                                         | KH <sub>2</sub> PO <sub>4</sub>        |                              |                  |
| 20.83 g/L                                                         | K <sub>2</sub> HPO <sub>4</sub>        |                              |                  |
| 0.032 g/L                                                         | Na <sub>2</sub> CO <sub>3</sub>        |                              |                  |
| 0.03 g/L                                                          | Cysteine-HCl                           |                              |                  |
| 1 mL/L                                                            | Trace element solution                 | 1 mL/L                       | Vitamin solution |
| FeCl <sub>2</sub> × 4 H <sub>2</sub> O                            | 1.5 g/L                                | Biotin                       | 20 mg/L          |
| CuCl <sub>2</sub> × 2 H <sub>2</sub> O                            | 2 mg/L                                 | Folic acid                   | 20 mg/L          |
| CoCl <sub>2</sub> × 6 H <sub>2</sub> O                            | 190 mg/L                               | Pyridoxine                   | 100 mg/L         |
| MnCl <sub>2</sub>                                                 | 100 mg/L                               | Thiamine                     | 50 mg/L          |
| Na <sub>2</sub> MoO <sub>4</sub> × 2 H <sub>2</sub> O             | 36 mg/L                                | Riboflavin                   | 50 mg/L          |
| NiCl <sub>2</sub> × 6 H <sub>2</sub> O                            | 24 mg/L                                | Nicotinic acid               | 50 mg/L          |
| Na <sub>2</sub> WO <sub>4</sub> × 2 H <sub>2</sub> O              | 20 mg/L                                | Calcium pantothenate         | 50 mg/L          |
| Na <sub>2</sub> SeO <sub>3</sub> × 5 H <sub>2</sub> O             | 3 mg/L                                 | Vitamin B <sub>12</sub>      | 20 mg/L          |
| ZnCl <sub>2</sub>                                                 | 70 mg/L                                | <i>p</i> -Amino benzoic acid | 80 mg/L          |
| H <sub>3</sub> BO <sub>3</sub>                                    | 6 mg/L                                 | Lipoic acid                  | 50 mg/L          |

**Table S5. Daily feeding of bioreactors A and B during the four HRT phases.**

| Bioreactor | HRT<br>(d) | Duration<br>(d) | Daily medium feeding |              |                        |                                | Daily effluent<br>withdrawing (mL) |
|------------|------------|-----------------|----------------------|--------------|------------------------|--------------------------------|------------------------------------|
|            |            |                 | Lactate<br>(g)       | Xylan<br>(g) | Mineral medium<br>(mL) | Deionised anoxic<br>water (mL) |                                    |
| A          | 8          | 0-51            | 1.47                 | 1.25         | 11                     | 114                            | 125                                |
|            | 6          | 52-80           | 1.96                 | 1.67         | 15                     | 152                            | 167                                |
|            | 4          | 81-106          | 2.94                 | 2.50         | 23                     | 227                            | 250                                |
|            | 2          | 107-211         | 5.88                 | 5.00         | 45                     | 455                            | 500                                |
| B          | 8          | 0-123           | 1.47                 | 1.25         | 11                     | 114                            | 125                                |
|            | 6          | 124-130         | 1.96                 | 1.67         | 15                     | 152                            | 167                                |
|            | 4          | 131-137         | 2.94                 | 2.50         | 23                     | 227                            | 250                                |
|            | 2          | 138-211         | 5.88                 | 5.00         | 45                     | 455                            | 500                                |
